1 **Acquisition of alveolar fate and differentiation competence by human fetal lung epithelial**  
2 **progenitor cells**

3

4 Kyungtae Lim<sup>1</sup>, Walfred Tang<sup>1</sup>, Dawei Sun<sup>1</sup>, Peng He<sup>2,3</sup>, Sarah A. Teichmann<sup>2</sup>, John C.  
5 Marioni<sup>2,3</sup>, Kerstin B. Meyer<sup>2</sup> and Emma L. Rawlins<sup>1,\*</sup>

6

7 <sup>1</sup> Wellcome Trust/CRUK Gurdon Institute, Department of Physiology, Development and  
8 Neuroscience, Wellcome Trust/MRC Stem Cell Institute, University of Cambridge, Cambridge,  
9 CB2 1QN, UK.

10

11 <sup>2</sup> Wellcome Sanger Institute, Hinxton, Cambridge, CB10 1SA, UK

12

13 <sup>3</sup> European Molecular Biology Laboratory, European Bioinformatics Institute (EMBL-EBI),  
14 Wellcome Genome Campus, Cambridge, UK.

15

16

17 \* Contact: e.rawlins@gurdon.cam.ac.uk

18

19 *Key words:* human lung development; distal tip; organoids; alveolar differentiation; NKX2.1;  
20 stem cell; Wnt.

21

22 **ABSTRACT**

23 Variation in lung alveolar development is strongly linked to disease susceptibility. However,  
24 the cellular and molecular mechanisms underlying alveolar development are difficult to study  
25 in humans. Using primary human fetal lungs we have characterized a tip progenitor cell  
26 population with alveolar fate potential. These data allowed us to benchmark a self-organising  
27 organoid system which captures key aspects of lung lineage commitment and can be efficiently  
28 differentiated to alveolar type 2 cell fate. Our data show that Wnt and FGF signalling, and the  
29 downstream transcription factors NKX2.1 and TFAP2C, promote human alveolar or airway  
30 fate respectively. Moreover, we have functionally validated cell-cell interactions in human lung  
31 alveolar patterning. We show that Wnt signalling from differentiating fibroblasts promotes  
32 alveolar type 2 cell identity, whereas myofibroblasts secrete the Wnt inhibitor, NOTUM,  
33 providing spatial patterning. Our organoid system recapitulates key aspects of human lung  
34 development allowing mechanistic experiments to determine the underpinning molecular  
35 regulation.

36

37

38

## 39 INTRODUCTION

40 During human lung development the airway tree is formed by branching between ~5 and 16  
41 post conception weeks (pcw) in the pseudoglandular stage of development. At the canalicular  
42 stage, ~16 to 26 pcw, the most distal epithelial tubes narrow, come into close proximity to  
43 capillaries and start to differentiate as alveolar epithelial cells<sup>1,2</sup>. Preterm infants born during  
44 the late canalicular stage have a rudimentary gas exchange surface and can survive if provided  
45 with specialised, neonatal intensive care. However, the molecular mechanisms underlying  
46 human alveolar development remain largely unknown.

47

48 During airway branching, the human tip epithelium is SOX9, SOX2 dual-positive and  
49 functions as a multipotent progenitor. Pseudoglandular tip epithelium has been cultured as self-  
50 renewing organoids which model the airway branching stage<sup>3,4</sup>. During the canalicular stage,  
51 as alveolar differentiation begins, tip progenitors become SOX9 single-positive and more  
52 cuboidal in shape<sup>3</sup>. We hypothesized that growth of tip organoids from canalicular stage lungs  
53 would provide an improved model for studying human alveolar differentiation.

54

55 Differentiation of human iPSCs to alveolar lineages suggests Wnt signalling is essential  
56 for alveolar fate<sup>5</sup>. NKX2.1 is also implicated in alveolar differentiation. In mouse lungs,  
57 Nkx2.1 is essential for alveolar differentiation and maintenance and binds to promoters of  
58 alveolar type 1 (AT1) and alveolar type 2 (AT2) cell-specific genes<sup>6</sup>. Heterozygous missense  
59 mutations in the *NKX2.1* homeodomain cause brain-lung-thyroid syndrome which includes  
60 disrupted surfactant gene expression and interstitial lung disease<sup>7,8</sup>. However, whether NKX2.1  
61 simply promotes surfactant synthesis, or has additional roles in human lung alveolar  
62 differentiation is currently unknown.

63

64 We find that SOX9<sup>+</sup> human lung tip progenitors acquire an AT2 gene expression  
65 signature by the canalicular stage of development. We derive, and characterise, a canalicular  
66 stage tip self-renewing organoid model. This has allowed us to determine upstream signals and  
67 downstream TFs which promote lung lineage commitment and investigate the spatial  
68 patterning of the developing alveolus.

69

## 70 RESULTS

### 71 Human fetal lung tip progenitor cells acquire alveolar lineage signatures *in vivo*

72 We investigated the distal lung tip epithelium of human fetal lungs at the pseudoglandular  
73 and canalicular stages. Consistent with our previous report<sup>3</sup>, pseudoglandular distal tips were  
74 columnar and marked by SOX9 and SOX2. The canalicular stage distal tip epithelium  
75 contained more cuboidal SOX2<sup>-</sup> SOX9<sup>+</sup> cells which co-expressed the AT2 cell markers, SFTPC  
76 and HTII-280 (Fig. 1A,B). We identified surface markers to distinguish between  
77 pseudoglandular and canalicular stage tips. CD44 marks tip epithelial cells across all stages of  
78 lung development tested. Whereas CD36 is expressed specifically in the canalicular stage tip  
79 (~16-21 pcw) where it is co-expressed with CD44, *SFTPC* and SOX9. A lower level of both  
80 CD44 and CD36 extends into the SOX9/PDPN<sup>+</sup> tip-adjacent cells and CD44 extends further  
81 proximally into the differentiating stalk region (Figs. 1C-F; Extended Data Fig. 1A,B).

82

83 Distal lung regions were dissected to enrich for the tip and EPCAM<sup>+</sup> cells were sorted for  
84 CD44 and/or CD36. At the pseudoglandular stage (11 pcw), 75% of sorted cells were CD44<sup>+</sup>  
85 and CD44<sup>+</sup>CD36<sup>+</sup> cells were rare (Fig. 1G; *blue*). By contrast, at the canalicular stage (20 pcw)  
86 53% of sorted cells were CD44<sup>+</sup>CD36<sup>+</sup> and only 17% were single CD44<sup>+</sup> (Fig. 1G; *red*). qRT-  
87 PCR showed that the 17-20 pcw CD44<sup>+</sup>CD36<sup>+</sup> cells robustly expressed *CD36*, *CD44*, *SFTPC*  
88 and *SOX9*, but extremely low levels of the airway markers, *TP63* and *SOX2*, consistent with  
89 the immunostaining (Fig. 1H). In contrast, single CD44<sup>+</sup> cells showed a higher level of *SOX2*,  
90 but much lower levels of *SFTPC* and *SOX9*, suggesting that they are derived from the  
91 CD44<sup>+</sup>SOX9<sup>-</sup> stalk region (Fig. 1H; Extended Data Fig. 1B). Finally, the CD44<sup>-</sup>CD36<sup>-</sup> cells  
92 had higher levels of *TP63* and *SOX2*, but low *SFTPC* and *SOX9*, indicating they are derived  
93 from more proximal airway-lineage cells (Fig. 1H). Therefore, dual expression of CD44 and  
94 CD36 marks the tip epithelial population in the canalicular stage lung.

95

### 96 **Gradual acquisition of tip alveolar lineage signature during human lung development**

97 Flow cytometric analysis showed that the expression of CD36 was robustly acquired  
98 between 13 and 15 pcw, prior to the canalicular stage (Fig. 1I). Similarly, in the CD36<sup>+</sup> cells,  
99 the mRNA levels of *SFTPC*, *CD36*, and *LAMP3* began to increase from 13 pcw onward (Fig.  
100 1J). We confirmed that CD36 was detectable in the tip epithelium at exactly 14 pcw, moreover  
101 the intensity of *SFTPC* transcripts increased while *SOX9* gradually lowered during this  
102 transition period (Fig. 1K-M). These results show that the acquisition of AT2 lineage signatures  
103 occurs gradually in the tip epithelium prior to the canalicular stage.

104

### 105 **Organoids derived from distal tip epithelium at the canalicular stage exhibit alveolar** 106 **lineage signatures**

107 To determine the fate potential of the canalicular stage (17-20 pcw) distal tip, CD44<sup>+</sup>CD36<sup>+</sup>  
108 cells were cultured for 3 weeks (Fig. 2A). Two morphologically distinct organoids formed:  
109 cystic and folded (Fig. 2B). All the folded organoids consisted of cuboidal cells and expressed  
110 both progenitor and AT2 markers, including an *SFTPC*-eGFP reporter (Fig. 2C). By contrast,  
111 the cystic organoids had a columnar cell shape and expressed tip progenitor markers, but not  
112 AT2 markers, resembling the pseudoglandular tip epithelium (Fig. 2B-E; Extended Data Fig.  
113 2A,B). For simplicity, we refer to the folded and cystic organoids isolated from 17-21 pcw  
114 lungs as lineage positive (Lin<sup>POS</sup>) and negative (Lin<sup>NEG</sup>).

115

116 We tested whether any organoids (from the mixed Lin<sup>POS</sup> and Lin<sup>NEG</sup> population) retained  
117 CD44 and CD36 expression after 3 weeks culture (Fig. 2F). The CD44<sup>+</sup>CD36<sup>+</sup> cells showed  
118 the highest level of *SFTPC* with a moderate level of *SOX9*, but very low levels of *SOX2* and  
119 *TP63*. They were located at the tips of the Lin<sup>POS</sup> organoids where they expressed *SFTPC*,  
120 HTII-280, *SOX9*, *CD44* and *KI67* (Fig. 2G,H; Extended Data Fig. 2C-F). The CD44<sup>-</sup>CD36<sup>-</sup>  
121 cells had the highest levels of *TP63* and *SOX2*. They corresponded to the inner parts of the  
122 Lin<sup>POS</sup> organoids where scattered TP63<sup>+</sup> cells were found (Fig. 2G,H; Extended Data Fig. 2D).  
123 By contrast, the CD44<sup>+</sup>CD36<sup>-</sup> cells had the highest level of *SOX9* and a moderate level of *SOX2*,  
124 but no lineage markers, and corresponded to the Lin<sup>NEG</sup> organoids which had uniform CD44,  
125 *SOX2* and *SOX9* (Fig. 2G,H; Extended Data Fig. 2E). These data suggested that the  
126 CD44<sup>+</sup>CD36<sup>+</sup> canalicular stage tip cells originally plated had self-renewed (at the tips) and

127 differentiated towards airway lineages (in the centre) to form the Lin<sup>POS</sup> organoids. Moreover,  
128 that a fraction of the CD44<sup>+</sup>CD36<sup>+</sup> tip cells had also grown into Lin<sup>NEG</sup> organoids, resembling  
129 the pseudoglandular stage tips. To test this hypothesis, we infected freshly-isolated  
130 CD44<sup>+</sup>CD36<sup>+</sup> epithelial cells with *SFTPC*-eGFP<sup>+</sup> lentivirus and sorted for eGFP. We observed  
131 that sorted *SFTPC*-eGFP<sup>+</sup> cells formed both Lin<sup>POS</sup> and Lin<sup>NEG</sup> organoids (Extended Data Fig.  
132 2G-I). These data suggest that the emergence of Lin<sup>NEG</sup> organoids, which are similar to  
133 pseudoglandular stage tip organoids, is due to dedifferentiation of the epigenetically unstable  
134 canalicular tip epithelium. However, we cannot exclude the possibility that the canalicular tip  
135 epithelium contains a mixture of cell states.

136

137 We tested if the CD44<sup>+</sup>CD36<sup>+</sup> cells continued to self-renew upon passaging. P0 organoids  
138 (mixed population of Lin<sup>POS</sup> and Lin<sup>NEG</sup>) were sorted as CD44<sup>+</sup>CD36<sup>+</sup>, CD44<sup>+</sup>CD36<sup>-</sup> and  
139 CD44<sup>-</sup>CD36<sup>-</sup> and cultured separately in the self-renewal medium. Only the CD44<sup>+</sup>CD36<sup>+</sup> cells  
140 were able to generate a large proportion of Lin<sup>POS</sup> organoids with folded structure and  
141 progenitor/AT2 gene signature (Figs. 2I-K; Extended Data Fig. 2J-L). In contrast, the  
142 CD44<sup>+</sup>CD36<sup>-</sup> cells, derived from Lin<sup>NEG</sup> organoids, produced Lin<sup>NEG</sup> organoids. The CD44<sup>-</sup>  
143 CD36<sup>-</sup> cells, derived from the centre of the Lin<sup>POS</sup> organoids, largely formed airway-fated  
144 spheres expressing a significantly higher level of *TP63*/*TP63* (Fig. 2I-K; Extended Data Fig.  
145 2J-L). These data conclusively demonstrate that the CD44<sup>+</sup>CD36<sup>+</sup> cells are the major tip  
146 progenitor subpopulation *in vitro* and can maintain the Lin<sup>POS</sup> organoids. We have therefore  
147 captured the canalicular stage lung tip epithelial population which co-expresses *SOX9* and *AT2*  
148 markers in the Lin<sup>POS</sup> organoids.

149

150 We performed RNAseq to compare the transcriptome of passaged pseudoglandular stage  
151 tip organoids derived from 8-9 pcw<sup>3</sup> with passaged canalicular stage Lin<sup>NEG</sup> and Lin<sup>POS</sup>  
152 organoids (Extended Data Fig. 3A). Hierarchical clustering and principal component analysis  
153 showed that the Lin<sup>NEG</sup> organoids were very similar to the pseudoglandular organoids, but  
154 distinct from the Lin<sup>POS</sup> organoids (Fig. 2L; Extended Data Fig. 3B). We identified >280  
155 differentially expressed genes between the Lin<sup>POS</sup> and Lin<sup>NEG</sup> organoids (Supplementary Table  
156 1; Extended Data Fig. 3C; log<sub>2</sub>FC>4, P<0.05). Similar to the pseudoglandular organoids, the  
157 Lin<sup>NEG</sup> organoids were highly associated with Gene Ontology (GO) terms related to ion  
158 transport and branching morphogenesis, confirming that they resemble the pseudoglandular  
159 stage distal tips. Whereas the Lin<sup>POS</sup> organoids had significant GO terms for respiratory  
160 gaseous exchange and lung alveolus development, as well as canonical Wnt pathway signalling  
161 (Extended Data Fig. 3D-G). Moreover, the Lin<sup>POS</sup> organoids were enriched for AT2 markers  
162 *SFTPC*, *SLC34A2*, *NAPSA*, *LPCAT1*, *FOXP2*, and *CEBPD*, Wnt signalling-related genes  
163 *CTNNB1*, *TCF7L1*, *WNT7B*, *WIF1*, *LRRK2* and low levels of airway genes *TP63*, *SCGB3A1*,  
164 *SCGB3A2* (Fig. 2M; Supplementary Table 1). These data confirm that the passaged Lin<sup>POS</sup>  
165 organoids recapitulate key molecular characteristics of the canalicular stage lung tip epithelial  
166 progenitors.

167

## 168 **Coordinated control of the canalicular stage tip epithelial cell fate by Wnt and FGF** 169 **signalling**

170 To determine which signalling cues direct differentiation of the canalicular tips, tip



171 epithelium was isolated from the distal lung and directly exposed to pairwise signal  
172 combinations (Fig. 3A; Extended Data Fig. 4A). The cells did not grow in the absence of  
173 SMADi (Noggin and SB431542) (Fig. 3B; Extended Data Fig. 4B). However, we observed  
174 that two distinct populations of organoids could be obtained by combining SMADi with CHIR  
175 (CHIR99021, a Wnt agonist), or with FGFs (FGF7 and FGF10) (Fig. 3B). Organoids grown in  
176 SMADi/CHIR had a thin epithelium with a hollow lumen. They could not be passaged and  
177 expressed the highest level of *SFTPC*, greater than the Lin<sup>POS</sup> organoids. In contrast, organoids  
178 grown in SMADi/FGF formed spheres with a small lumen, a relatively thick, proliferative  
179 epithelial layer and expressed the highest level of TP63 (Fig. 3B-D). In both conditions *SOX9*  
180 levels were lower than the Lin<sup>POS</sup> and Lin<sup>NEG</sup> organoids (Fig. 3C). These data indicate that Wnt  
181 and FGF signalling promote the lineage determination of the canalicular stage tip epithelium  
182 to alveolar or airway lineages, in agreement with previously published data<sup>5,9</sup>. Moreover, when  
183 SMADi/CHIR/FGFs were combined (equivalent to our self-renewing medium) organoids  
184 displayed a mixture of alveolar and airway characteristics, as in the Lin<sup>POS</sup> organoids (Fig. 3D).

185

186 We demonstrated that the canalicular stage tips are highly plastic and can switch readily  
187 between alveolar and airway differentiation by altering the medium and observing rapid  
188 organoid morphology and gene expression changes (Extended Data Fig. 4C-E). Moreover,  
189 FGF7 alone, without FGF10, was sufficient to promote airway fate (Extended Data Fig. 4F,G).  
190 Freshly-isolated pseudoglandular stage (8 pcw) distal tip epithelial cells did not show similar  
191 levels of differentiation when grown in the same conditions (Fig. 4H). These data indicate that  
192 the canalicular stage tip progenitors are both highly plastic and in a differentiation-ready state  
193 compared to the pseudoglandular tip.

194

195 We reasoned that Wnt and FGF signalling likely control lineage determination of the tip  
196 epithelium *in vivo*. In canalicular stage tissue, we found that the *SFTPC*<sup>+</sup> tips expressed higher  
197 levels of the Wnt targets *AXIN2* and *WIF1*, compared with stalk and airway epithelium (Figs.  
198 3F-H; Extended Data Figs. 4H,I; 5A-D). We observed that *WNT2* is co-expressed with *FGFR4*  
199 in fibroblasts throughout the canalicular stage (Fig. 4A); putative alveolar fibroblasts<sup>10</sup>. This  
200 led us to question how Wnt-responsive *SFTPC* could be precisely restricted to the tip  
201 epithelium in the presence of widespread *WNT2*. A secreted Wnt inhibitor, *NOTUM*<sup>11</sup>, is  
202 expressed in both the distal tip epithelium and the myofibroblast/smooth muscle population  
203 which surrounds the differentiating epithelial stalk cells (Fig. 4B,C; Extended Data Fig. 5B,C).  
204 The *NOTUM*<sup>+</sup> myofibroblasts co-express the Wnt targets *LEF1* and *AXIN2*, suggesting that  
205 they may also be responding to Wnt (Extended Data Fig. 5C,D). We hypothesised that in  
206 response to the WNT2 signal, the stalk myofibroblasts locally secrete NOTUM, preventing the  
207 stalk epithelium from experiencing a high level of Wnt activity, allowing them to turn off  
208 *SFTPC* and exit the tip fate. We identified surface antigens for the specific isolation of WNT2<sup>+</sup>  
209 fibroblasts or NOTUM<sup>+</sup> myofibroblasts (Fig. 4D; Extended Data Fig. 5E,F). Isolated  
210 PDGFRA<sup>+</sup>CD141<sup>+</sup> myofibroblasts express high levels of *ACTA2*, *NOTUM* and *LEF1*. Whereas  
211 PDGFRA<sup>-</sup>CD141<sup>-</sup> fibroblasts express high levels of *WNT2* and *FGFR4* (Fig. 4E). This specific  
212 gene expression is maintained if the cell types are cultured individually for 14 days. When  
213 freshly isolated fibroblasts and myofibroblasts were co-cultured, the levels of *LEF1* and  
214 *NOTUM* expression increased in the myofibroblasts, suggesting that they are indeed

215 responding to WNT2 from the fibroblasts (Extended Data Fig. 5G).

216

217 We therefore asked whether co-culture with the PDGFRA<sup>-</sup>CD141<sup>-</sup> fibroblasts, or  
218 PDGFRA<sup>+</sup>CD141<sup>+</sup> myofibroblasts, could affect *SFTPC* expression in the Lin<sup>POS</sup> organoids  
219 (Fig. 4F). Lin<sup>POS</sup> organoids robustly express the *SFTPC*-GFP reporter when cultured in the  
220 self-renewing medium, but not in 2% FBS (Fig. 4G). However, co-culture with PDGFRA<sup>-</sup>  
221 CD141<sup>-</sup> fibroblasts is sufficient to substitute for the self-renewing medium and maintain  
222 *SFTPC*-GFP and endogenous *SFTPC* and *LAMP3* (Fig. 4H,I). By contrast, co-culture of the  
223 Lin<sup>POS</sup> organoids with PDGFRA<sup>+</sup>CD141<sup>+</sup> myofibroblasts, or both PDGFRA<sup>+</sup>CD141<sup>+</sup>  
224 myofibroblasts and PDGFRA<sup>-</sup>CD141<sup>-</sup> fibroblasts, did not support expression of AT2 genes.  
225 This leads us to propose that *in vivo* WNT2-expressing alveolar fibroblasts promote *SFTPC*  
226 expression in the distal tip. Moreover, that differentiating stalk cells are protected from the Wnt  
227 signal by the NOTUM-secreting myofibroblasts allowing them to turn off *SFTPC* and enter a  
228 differentiation programme (Fig. 4K).

229

230 Differentiating AT2 cells are also *SFTPC*<sup>+</sup>. We observed that the differentiating *SFTPC*<sup>+</sup>  
231 cells were never directly over-lain by the *NOTUM*<sup>+</sup> myoepithelial cells (Fig. 4J). This further  
232 supports the concept that the differentiating alveolar epithelium is patterned by signals from  
233 the myofibroblasts (Fig. 4K).

234

235 **NKX2.1 is a major driving force for alveolar differentiation in the tip epithelial organoids.**

236 To identify putative transcription factors for cell differentiation we analysed chromatin  
237 accessibility of the pseudoglandular and Lin<sup>POS</sup> organoids by bulk-ATAC seq. There were ~2-  
238 fold more differentially open chromatin regions in the Lin<sup>POS</sup> than pseudoglandular organoids,  
239 consistent with the increased cell type complexity of the Lin<sup>POS</sup> organoids (Extended Data Fig.  
240 6A; Supplementary Table 2). The genomic distribution of the differentially opened chromatin  
241 was similar in both organoid types (Extended Data Fig. 6B). GO analysis of the genes nearest  
242 to differentially open chromatin was consistent with the RNA-seq data (Fig. 2; Extended Data  
243 Fig. 6C-E). However, a much higher proportion of lung development-associated genes had  
244 open chromatin at the promoter regions in the Lin<sup>POS</sup> organoids (Fig. 5A). For example, the  
245 promoter regions of lung differentiation genes *SFTPC*, *TP63*, *FOXP2* and *CD36* and Wnt  
246 signalling genes, *AXIN2*, *CTNNB1*, *DVL3*, *LRRK2* and *WIF1*, were more accessible in the  
247 Lin<sup>POS</sup> than pseudoglandular organoids (Fig. 5B; Extended Data Fig. 6D,E). These data  
248 strongly suggest that the chromatin accessibility of the Lin<sup>POS</sup> organoids is more favourable for  
249 lineage differentiation than the pseudoglandular organoids.

250

251 To predict which transcription factors (TFs) control cell fate specification, we performed  
252 TF motif analysis in the differential ATAC seq peaks and compared this with our RNA seq data.  
253 The motifs for FOSL1 and GATA6 binding were differentially open, and *FOSL1* and *GATA6*  
254 highly expressed, in the pseudoglandular organoids (Fig. 5C). In the Lin<sup>POS</sup> organoids, NKX2.1  
255 and TFAP2C motifs were accessible, and these factors were highly expressed (Fig. 5D).  
256 Immunostaining confirmed that NKX2.1 is more strongly expressed in the Lin<sup>POS</sup> than  
257 pseudoglandular organoids. Moreover, TFAP2C was absent in the pseudoglandular organoids,

258 but ubiquitous in the Lin<sup>POS</sup> organoids (Fig. 5E). *In vivo*, *NKX2-1* transcripts were most highly  
259 expressed in the alveolar regions of the lungs, whereas *TFAP2C* was expressed in the airway  
260 epithelium (Extended Data Fig. 7A,B).

261

262 We performed overexpression (OE) of *NKX2.1* and *TFAP2C* in the pseudoglandular  
263 organoids to test if either factor was sufficient to induce differentiation to the alveolar or airway  
264 lineages (Fig. 5F). *NKX2.1* OE resulted in ~60% of the pseudoglandular organoids acquiring  
265 an alveolar-like structure with high levels of *SFTPC* expression (Fig. 5G-J; Extended Data Fig.  
266 7C). *NKX2.1* also significantly upregulated other AT2 lineage markers including *SCL34A2*,  
267 *LAMP3*, *CEBPD*, *HOPX* and *AXIN2*, but downregulated the tip markers *SOX9*, *SOX2* and  
268 *CD44* (Fig. 5K). In contrast, *TFAP2C* OE caused around 70% of the organoids to form  
269 bronchiolar-like structures and significantly increased basal cell markers including *TP63/P63*,  
270 *KRT5* and *NGFR*, (Fig. 5G-J; Extended Data Fig. 7C,D). Therefore, *NKX2.1* and *TFAP2C*  
271 function as key regulators of differentiation toward AT2 and basal cell lineages respectively.

272

273 The Lin<sup>POS</sup> organoid cells co-express high levels of *NKX2-1* and *TFAP2C* (Fig. 5E) yet are  
274 comprised of distinct *SOX9/SFTPC*<sup>+</sup> tip and *TP63*<sup>Lo</sup> central regions (Fig. 2). We analysed the  
275 relationship between *NKX2.1* and *TFAP2C* by overexpressing them together in the  
276 pseudoglandular organoids. The *NKX2.1/TFAP2C* OE organoids were highly folded, similar  
277 to *NKX2-1* OE. Furthermore, *TP63* was barely detectable, but *SFTPC* was markedly induced  
278 (Extended Data Fig. 7E). When Lin<sup>POS</sup> organoids were cultured in SMADi/CHIR/FGF7,  
279 *NKX2.1* and *SFTPC* were high, but *TP63* and *TFAP2C* were low. Whereas in SMADi/FGF7  
280 (without the Wnt agonist), *NKX2.1* decreased ~2-fold, *SFTPC* turned off and *TP63* and  
281 *TFAP2C* were robustly expressed (Extended Data Fig. 7F). These data clearly demonstrate that  
282 high *NKX2.1* expression, in combination with Wnt signalling, suppresses the airway lineage  
283 program, also explaining why *TP63* expression is low in the Lin<sup>POS</sup> organoids although  
284 *TFAP2C* is expressed (Extended Data Fig. 7F). Further support for the importance of *NKX2.1*  
285 in promoting alveolar and inhibiting airway differentiation came from an *NKX2.1* knock-down  
286 experiment in the Lin<sup>POS</sup> organoids. A small decrease in *NKX2.1* expression was sufficient to  
287 decrease AT2-specific gene expression and increase *TP63* (Fig. 5L).

288

### 289 **Organoid assays can be used to predict the effects of human genetic variation**

290 Overexpression of *NKX2.1* containing a deleted DNA binding homeodomain showed that  
291 the homeodomain is essential for AT2 differentiation (Fig. 6A,B). Numerous naturally-  
292 occurring human variants in the *NKX2.1* homeodomain have been described<sup>12-14</sup>. Many of  
293 these are associated with acute respiratory failure, others are predicted to be pathogenic. We  
294 hypothesized that the *NKX2.1* OE assay would be a simple method to determine the effects of  
295 these variants on AT2-specific gene expression (Fig. 6C). The variants differentially affected  
296 organoid morphology, AT2 gene transcription and surfactant protein production (Fig. 6D-F),  
297 with the predicted pathogenic c.485\_487 deletion behaving indistinguishably to the wildtype  
298 control. Interestingly, expression of the *NKX2.1* variants (c.523G>T and c532C>T) often  
299 resulted in the production of mis-localised pro-*SFTPC* which was not processed to the mature  
300 form (Fig. 6D,F). This strongly suggests that *NKX2.1* promotes multiple aspects of AT2  
301 differentiation, not simply *SFTPC* transcription.

302

### 303 **Cultured canalicular stage tip cells differentiate readily into alveolar type 2 cells**

304 NKX2-1 OE pseudoglandular organoids had higher levels of SFTPC and ACE2 than Lin<sup>POS</sup>  
305 organoids, consistent with differentiation to AT2 fate (Fig. 7A; Extended Data Fig. 8A). We  
306 hypothesized that a medium change would allow passaged Lin<sup>POS</sup> organoids to differentiate  
307 into AT2 cells. In medium containing DAPT (Notch inhibition), DCI (dexamethasone, cAMP,  
308 IBMX), CHIR (Wnt agonist) and SB431542 (TGF $\beta$  inhibition), *NKX2-1*, *SFTPC* and *ACE2*  
309 were upregulated and *SOX9*, *SOX2* and *TP63* downregulated (Fig. 7B,C). Moreover, the  
310 *SFTPC*-GFP reporter and the AT2-specific proteins LAMP3, HOPX and ACE2 were increased  
311 (Fig. 7C,D; Extended Data Fig. 8B-D). The pseudoglandular organoids did not differentiate  
312 towards AT2 fate in response to the same medium (Fig. 7E), confirming that the canalicular  
313 stage tips are in a distinct differentiation-ready state.

314

315 Electron microscopy revealed that the Lin<sup>POS</sup> organoids in the SN medium contained rare,  
316 immature lamellar bodies usually surrounded by glycogen (Fig. 7F,G). Whereas higher  
317 numbers of lamellar bodies with a characteristic surfactant projection core were readily visible  
318 in the differentiated organoids (Fig. 7F,G)<sup>15,16</sup>. NKX2.1 protein levels were increased following  
319 AT2 differentiation (Fig. 7H). The differentiated cells also more efficiently processed pro-  
320 SFTPC and SFTPB to the mature form (Fig. 7H)<sup>16</sup>. Moreover, NKX2.1 binds more strongly to  
321 the promoters of AT2-specific genes following differentiation (Fig. 7I). These data demonstrate  
322 that the Lin<sup>POS</sup> organoids are readily differentiated to an AT2-like fate and confirm the  
323 importance of NKX2.1 levels in this process.

324

325

## 326 DISCUSSION

327 We show that the distal tip cells at the canalicular stage of human lung development retain their  
328 progenitor status yet exhibit aspects of AT2 gene expression and can be isolated using specific  
329 surface proteins. Late-tip cell (Lin<sup>POS</sup>) organoids self-renew, capture features of the canalicular  
330 stage of human lung development, have extensive open chromatin and can be readily  
331 differentiated to AT2-like cells. We have used this organoid system to demonstrate that Wnt  
332 signalling and NKX2.1 are required for human AT2 cell differentiation. Additionally, we show  
333 that antagonistic signalling interactions between differentiating fibroblasts and myofibroblasts  
334 provide a spatial component to Wnt activation allowing patterning of the alveolar epithelium  
335 into specific lineages. We also demonstrate that our organoid system can be used to study  
336 human genetic variation.

337  
338 One of major insights of this work is the demonstration that the molecular acquisition of  
339 alveolar features precedes morphological changes occurring in the tip epithelium at the  
340 canalicular stage. Our Lin<sup>POS</sup> organoids are derived from the CD44<sup>+</sup>,CD36<sup>+</sup> canalicular stage  
341 tips. The CD44<sup>+</sup>,CD36<sup>+</sup> cells are located at the tips of the organoids, maintain expression of  
342 SOX9 and AT2 markers, self-renew and give rise to airway-fated cells in the centre of the  
343 organoids (Fig. 2). When provided with appropriate cues they differentiate to an AT2-like cell  
344 (Fig. 7). *In vivo*, tip cells acquire AT2 markers gradually between 13 and 15 pcw (Fig. 1). We  
345 hypothesize that during this transition period (~13–15 pcw) the tips are generating the final  
346 branch of the airway epithelium and at ~15 pcw switch to generating alveolar fated daughter  
347 cells. However, due to well-documented tip progenitor cell plasticity in transplantation  
348 assays<sup>17,18</sup>, it is not yet possible to test this definitively.

349  
350 We identify Wnt signalling as a key driver of human AT2 fate and patterning. Wnt  
351 signalling promotes AT2 differentiation of the tip epithelium *in vitro* and *in vivo* (Fig. 3,4). This  
352 is consistent with previous reports in mouse<sup>19</sup>. Similarly, human NKX2.1<sup>+</sup> lung progenitors  
353 derived from PSCs expressed alveolar epithelial markers in response to Wnt<sup>5</sup>. Our experiments  
354 with primary tissue support a model in which opposing signals from differentiating alveolar  
355 fibroblasts and myofibroblasts spatially restrict late tip and AT2 identity in the canalicular stage  
356 human lung (Fig. 4). These data are analogous to a recent mouse report where developing AT1  
357 cells are aligned with, and signal to, differentiating myofibroblasts<sup>20</sup>. It will be interesting to  
358 test in the future whether myofibroblast inhibition of AT2 cell fate occurs in pulmonary fibrosis  
359 where myofibroblasts are expanded and AT2 cells lost.

360  
361 We clearly demonstrate that NKX2.1 is a key upstream TF driving the onset of the alveolar  
362 program whilst suppressing the airway program (Fig. 5), consistent with reported roles in lung  
363 cancers<sup>21</sup>. Our data also strongly suggest that Wnt is upstream of NKX2.1 during alveolar  
364 differentiation. By contrast, FGF signalling and TFAP2C cooperate to promote airway fate.  
365 Ectopic expression of TFAP2C promoted the expression of basal cell markers, but not other  
366 airway lineages (Fig. 5). This could mean the culture conditions are permissive only for basal  
367 cell differentiation. Alternatively, TFAP2C may be specific for basal cell specification. The  
368 latter interpretation would be consistent with a report that TFAP2C activates TP63 expression  
369 during epidermal lineage maturation<sup>22</sup>.



370

371 In summary, we have identified a distinct late-tip progenitor cell state in the developing  
372 human lung. Culture of these cells as organoids has allowed us to investigate the roles of Wnt  
373 signalling and NXX2.1 in human AT2 cell development. Moreover, this differentiating  
374 organoid system will be useful for understanding the next phases of the alveolar maturation  
375 process at the sacular and alveolar stages in the developing human lung.

376

### 377 **ACKNOWLEDGEMENTS**

378 We would like to acknowledge the Gurdon Institute Imaging Facility and Dr Karin Mueller of  
379 Cambridge Advanced Imaging Centre for microscopy support. Prof Azim Surani for  
380 epigenetics advice. KL is supported by Basic Science Research Program through the National  
381 Research Foundation of Korea (NRF) funded by the Ministry of Education  
382 (2018R1A6A3A03012122). DS is supported by a Wellcome Trust PhD studentship  
383 (109146/Z/15/Z) and the Department of Pathology, University of Cambridge ELR. is supported  
384 by Medical Research Council (MR/P009581/1; MR/S035907/1). Gurdon Institute Core  
385 support from the Wellcome Trust (203144/Z/16/Z) and Cancer Research UK (C6946/A24843).  
386 KBM and SAT acknowledge funding from the MRC (MR/S035907/1) and from Wellcome  
387 (WT211276/Z/18/Z and Sanger core grant WT206194).

388

389

### 390 **AUTHOR CONTRIBUTIONS**

391 Conceptualization, KL and ELR; Methodology, Investigation, and Validation, KL, DS ;  
392 Software and Formal Analysis, KL, WT, PH; Writing–Original Draft by KL; Writing – Review  
393 & Editing, ELR; Funding Acquisition and Supervision: ELR, SAT, JCM, KBM.

394

395

396 **FIGURE LEGENDS**

397 **Fig. 1. Human fetal lung tip progenitor cells acquire alveolar features during normal**  
398 **development.**

399 (A and B) Human fetal lung at pseudoglandular and canalicular stages; 11, 19 pcw (A) and 10,  
400 20 pcw (B). Tip epithelium (arrowheads) is marked by E-cadherin, SFTPC, HTII-280, and  
401 SOX9. SOX2, airway epithelium (A).

402 (C-F) Surface antigens, CD44 and CD36, mark tip epithelium at pseudoglandular and  
403 canalicular stages. Lungs at 10 (C), 17 (D, F), and 19 pcw (E) were stained with CD36 and  
404 CD44 and/or SOX2 and SOX9 antibodies. Arrows (D) show patterning from distal to proximal  
405 regions. Yellow dashed lines (E) indicate separation of SOX9<sup>+</sup> tip regions from the PDPN<sup>+</sup>  
406 stalk. The *SFTPC* transcript was visualised by *in situ* HCR (F) following immunostaining for  
407 CD36.

408 (G) Flow cytometry of the human lung tip epithelial population at the pseudoglandular and  
409 canalicular stages, 11 (*blue*) and 20 pcw (*red*).

410 (H) qRT-PCR of the freshly purified lung epithelial cells from canalicular stage lungs sorted.  
411 Data normalized to fresh EPCAM<sup>+</sup> cells from 20 pcw distal tissues; mean  $\pm$  SD,  $n = 7$  (15~21  
412 pcw). Significance evaluated by 1-way ANOVA with Tukey multiple comparison post-test; ns:  
413 not significant, \* $P < 0.05$ , \*\* $P < 0.01$ , \*\*\* $P < 0.001$ .

414 (I) Proportion of the freshly purified tip epithelium as CD44<sup>+</sup>CD36<sup>-</sup> or CD44<sup>+</sup>CD36<sup>+</sup> at 11, 13,  
415 15, 18, 20 and 21 pcw;  $n = 1$  each time.

416 (J) Relative mRNA levels of the tip progenitor markers, *SOX9* and *SOX2*, and type 2 alveolar  
417 lineage markers, *SFTPC*, *CD36* and *LAMP3*, in CD44<sup>+</sup>CD36<sup>-</sup> tip epithelial population at 11  
418 and 13 pcw, and in CD44<sup>+</sup>CD36<sup>+</sup> tip epithelial population at 15, 16, 18, 20 and 21 pcw, by  
419 qRT-PCR. Data was normalized to fresh EPCAM<sup>+</sup> cells from 20 pcw tip tissues;  $n = 1$  at each  
420 stage.

421 (K and L) Human fetal lung tissues during the transition from 13 to 15 pcw were stained using  
422 antibodies against CD36, CD44, and CD31 (K), or for *SFTPC* and *SOX9* mRNA (L). Three 13  
423 pcw, two 14 pcw, and two 15 pcw samples.

424 (M) Signal intensity of *SOX9* and *SFTPC* transcripts in Fig. 1L. Ten tip regions analysed per  
425 stage and the intensity represented as mean  $\pm$  SD. Significance evaluated by 1-way ANOVA  
426 with Tukey multiple comparison post-test; ns: not significant, \* $P < 0.05$ , \*\* $P < 0.01$ , \*\*\* $P < 0.001$ ,  
427 \*\*\*\* $P < 0.001$ .

428 DAPI, nuclei. Scale bar, 50  $\mu$ m.

429

430 **Extended Data Fig. 1. Characterization of the lung tip epithelium at the canalicular stages.**

431 (A and B) Frozen sections of human fetal lung tissues at 17 pcw. Stained for CD36, E-cadherin  
432 and PDPN (A) and CD36, CD44 (B). Arrowheads indicate CD36<sup>+</sup>PDPN<sup>-</sup> tips. Inset (B) shows  
433 a CD44<sup>+</sup>, CD36<sup>-</sup> stalk epithelial region. DAPI, nuclei. Scale bars, 50  $\mu$ m.

434

435 **Fig. 2. CD36, CD44 dual-positive tip cells self-renew and undergo lineage commitment *in***  
436 ***vitro* to form canalicular stage lung organoids.**

437 (A) Isolation and viral infection of CD44<sup>+</sup>CD36<sup>+</sup> tip epithelial cells from human fetal lungs at  
438 the canalicular stage and *in vitro* culture in self-renewing (SN) medium.

439 (B and C) Gross morphology (B) of the cultured epithelial tip organoids. Detailed morphology  
440 (C) E-cadherin (magenta); *SFTPC*-GFP and *TagRFP*. Arrows and arrowhead indicate folded  
441  $\text{Lin}^{\text{POS}}$  organoids and cystic  $\text{Lin}^{\text{NEG}}$  organoids, respectively. Scale bars, 100  $\mu\text{m}$ .  
442 (D) Gene expression profile of the  $\text{Lin}^{\text{POS}}$  and  $\text{Lin}^{\text{NEG}}$  organoids. Data are quantified by qRT-  
443 PCR; mean  $\pm$  SD of 4 biological replicates. Significance evaluated by unpaired student *t*-test;  
444 \* $P < 0.05$ , \*\* $P < 0.01$ , \*\*\* $P < 0.001$ .  
445 (E) Immunofluorescence analysis of the  $\text{Lin}^{\text{POS}}$  (arrowheads) and  $\text{Lin}^{\text{NEG}}$  organoids (arrow) at  
446 passage 1 cultured in the SN medium, showing co-expression of SOX9 and SOX2. DAPI,  
447 nuclei. Scale bar, 50  $\mu\text{m}$ .  
448 (F and G) Canalicular stage lung tip organoids sorted into 3 populations at passage zero by  
449 FACS using antibodies against CD36 and CD44 (F). The sorted P0 cell populations were  
450 analysed by qRT-PCR (G). Data was normalized to total EPCAM<sup>+</sup> cells freshly sorted from 20  
451 pcw tissues; mean  $\pm$  SD ( $n = 5$ ). Significance was evaluated by 1-way ANOVA with Tukey  
452 multiple comparison post-test; \* $P < 0.05$ , \*\* $P < 0.01$ .  
453 (H) Tip organoids at passage zero cultured in self-renewal medium stained with SFTPC, HTII-  
454 280 and SOX2 antibodies. Arrowheads indicate the tip-like, SFTPC<sup>+</sup> subpopulation in the  
455  $\text{Lin}^{\text{POS}}$  organoids. Arrows indicate the  $\text{Lin}^{\text{NEG}}$  organoids.  
456 (I-K) Passage 1 organoids were grown from the sorted CD44<sup>+</sup>CD36<sup>+</sup>, CD44<sup>+</sup>CD36<sup>-</sup> or CD44<sup>-</sup>  
457 CD36<sup>-</sup> populations at Passage 0 and reanalysed for CD44 and CD36 at the end of Passage 1 (I;  
458 Extended Data Fig. 2L). Arrows and arrowheads indicate the  $\text{Lin}^{\text{POS}}$  and  $\text{Lin}^{\text{NEG}}$  organoids. The  
459 organoid forming efficiency (J) and the proportion (K) of the organoids of each morphological  
460 sub-type at passage 1 was measured at 3 weeks after plating. Data was represented as mean  $\pm$   
461 SD of 4 biological replicates. Scale bar, 100  $\mu\text{m}$ .  
462 (L) Hierarchical clustering analysis of bulk-RNA seq data using pseudoglandular,  $\text{Lin}^{\text{POS}}$  and  
463  $\text{Lin}^{\text{NEG}}$  organoids.  
464 (M) Heatmap analysis of selected genes highly enriched in pseudoglandular,  $\text{Lin}^{\text{NEG}}$  and  $\text{Lin}^{\text{POS}}$   
465 organoids.

466

## 467 **Extended Data Fig. 2. Characterization of the canalicular stage lung tip organoids.**

468 (A and B) Immunofluorescence analysis of the  $\text{Lin}^{\text{POS}}$  (arrowheads) and  $\text{Lin}^{\text{NEG}}$  organoids  
469 (arrow) at passage 1 cultured in the self-renewing medium, showing the alveolar lineage  
470 markers, SFTPC, HTII-280 (A) and LAMP3 (B, lower panel) were expressed in the  $\text{Lin}^{\text{POS}}$   
471 organoids, but not in the  $\text{Lin}^{\text{NEG}}$  organoids. DAPI, nuclei. Scale bar, 50  $\mu\text{m}$ .  
472 (C-E) Immunofluorescence images (C-E) of the  $\text{Lin}^{\text{NEG}}$  and  $\text{Lin}^{\text{POS}}$  organoids originating from  
473 sorted CD44<sup>+</sup>CD36<sup>+</sup> tip epithelium from 20 pcw lung. Antibodies against SOX9, HTII-280 (C),  
474 CD44, TP63, SOX2 (D) and CD44, KI67 (E). Arrow (E) indicates a  $\text{Lin}^{\text{NEG}}$  organoid. DAPI  
475 indicates nuclei. Scale bar, 50  $\mu\text{m}$ .  
476 (F) The percentage of KI67<sup>+</sup> cells in the CD44<sup>+</sup> tip and CD44<sup>-</sup> non-tip regions are represented  
477 as mean  $\pm$  SD of biological 4 replicates.  
478 (G-I) Diagram (G) illustrating isolation and *in vitro* culture of the tip epithelial cells infected  
479 with lentivirus harbouring *SFTPC* promoter-driven eGFP and EF1a promoter-driven TagRFP.  
480 The cells expressing *SFTPC-eGFP* were sorted at 48h post-infection and cultured in the self-  
481 renewing medium for 3 weeks (H). The  $\text{Lin}^{\text{NEG}}$  and  $\text{Lin}^{\text{POS}}$  organoids at passage zero derived  
482 from the *SFTPC-eGFP* positive-sorted tip epithelial cells (I). Low eGFP signals remained in

483 some Lin<sup>NEG</sup> organoids (arrowhead) confirming their derivation from SFTPC<sup>+</sup> tip cells. Scale  
484 bar, 50  $\mu$ m.

485 (J and K) Expression of lineage markers was investigated by immunostaining (J) and qRT-  
486 PCR (K) in the Lin<sup>POS</sup> organoids and airway-like spheres at passage 1 derived from the  
487 CD44<sup>+</sup>CD36<sup>+</sup> or CD44<sup>-</sup>CD36<sup>-</sup> passage zero subpopulations respectively. Data was normalized  
488 to EPCAM<sup>+</sup> cells freshly sorted from 20 pcw tip tissues and represented as mean  $\pm$  SD of 4  
489 biological replicates. Significance was evaluated by 2-way ANOVA with Bonferroni multiple  
490 comparison post-test; ns: not significant, \* $P$ <0.05.

491 (L) Diagram summarising the organoid experiments performed in Fig. 2. CD44<sup>+</sup>CD36<sup>+</sup> cells  
492 from canalicular stage lung tissues are the major tip progenitor subpopulation *in vitro*, growing  
493 into self-renewing Lin<sup>POS</sup> organoids showing key features of the canalicular stage lung tip cells.

494

### 495 **Extended Data Fig. 3. Transcriptomic analysis of the lung tip organoids**

496 (A) Morphology of the pseudoglandular organoids from the pseudoglandular stage, and the  
497 Lin<sup>POS</sup> and Lin<sup>NEG</sup> organoids from the canalicular stage. The Lin<sup>POS</sup> and Lin<sup>NEG</sup> organoids  
498 grown from EPCAM<sup>+</sup> tip epithelial cells were manually separated and cultured in the self-  
499 renewing culture condition.

500 (B) Principal component analysis of bulk-RNA seq data using pseudoglandular organoids,  
501 Lin<sup>POS</sup> and Lin<sup>NEG</sup> organoids.

502 (C) Volcano plot showing differentially expressed genes between Lin<sup>POS</sup> organoids (*red*)  
503 versus Lin<sup>NEG</sup> organoids (*dark blue*); log<sub>2</sub>FC > 4.

504 (D) Gene ontology (GO) enrichment analysis performed for biological process (BP)-  
505 associated GO terms on the differentially expressed genes between the Lin<sup>POS</sup> and Lin<sup>NEG</sup>  
506 organoids; log<sub>2</sub>FC > 4.

507 (E) KEGG pathway analysis using Enrichr. Length of coloured bars indicates combined  
508 enrichment score by adjusted p-value < 0.05.

509 (F and G) Gene set enrichment (GSEA) analysis of the differentially expressed genes of the  
510 Lin<sup>POS</sup> organoids (F) and pseudoglandular organoids (G).

511

### 512 **Fig. 3. Wnt and FGF signalling coordinate human tip cell maintenance and differentiation** 513 *in vitro*

514 (A) Diagram showing *in vitro* culture of the tip epithelial cells for 2 weeks in single or pairwise  
515 combinations of signalling cues: FGFs (FGF7, FGF10), SMADi (Noggin, SB431542), CHIR  
516 (CHIR99021) and EGF.

517 (B) Morphology of the tip organoids cultured in different culture conditions for 2 weeks.  
518 Representative image from 1 biological replicate is shown; n=4 biological replicates in total.  
519 Scale bar, 200  $\mu$ m.

520 (C) Relative mRNA levels of *SOX9*, *SFTPC* and *TP63* measured by qRT-PCR. Normalized to  
521 a Lin<sup>POS</sup> organoid line; mean  $\pm$  SD of 4 independent biological replicates. Significance was  
522 evaluated by 1-way ANOVA with Tukey multiple comparison post-test; ns: not significant,  
523 \* $P$ <0.05 and \*\* $P$ <0.01.

524 (D) Immunofluorescence analysis of the tip organoids at passage zero cultured in the different  
525 culture conditions. Antibodies against E-cadherin, SFTPC, TP63 and SOX2 were used. Scale  
526 bar, 20  $\mu$ m.

527 (E) Immunofluorescence analysis of the pseudoglandular organoids derived from an 8 pcw  
528 pseudoglandular stage lung in the different conditions at passage 0. Antibodies against SFTPC,  
529 TP63, E-cadherin and SOX2 were used. Scale bar, 50  $\mu\text{m}$ .

530 (F-H) Frozen sections of human fetal lung tissues at 17 pcw (F) and 20 pcw (G) were  
531 immunostained for AXIN2, E-cadherin and SOX2 (F), or ACTA2 followed by *in situ* HCR for  
532 *SFTPC* and *AXIN2* (G). Arrowheads (F) indicate AXIN2<sup>+</sup> tip epithelial cells. Red dashed line  
533 in the inset (G) indicates SFTPC<sup>+</sup> tip epithelial cells. *AXIN2* signals were counted from 20 areas  
534 of tips and stalks and 10 areas of airway across 3 independent lung tissues at 18-20 pcw (H).  
535 Significance was evaluated by 1-way ANOVA with Tukey multiple comparison post-test; ns:  
536 not significant, \* $P < 0.05$ , \*\* $P < 0.01$ , \*\*\* $P < 0.001$  and \*\*\*\* $P < 0.0001$ . Scale bar, 50  $\mu\text{m}$ .  
537 DAPI indicates nuclei.

538

#### 539 **Extended Data Fig. 4. High plasticity of the canalicular stage tip epithelial cells in** 540 **response to Wnt and FGF signalling.**

541 (A) The population of EPCAM<sup>+</sup> tip epithelial cells in the distal lung tissue at 20 pcw was  
542 isolated using MACS and were analysed by CD44 and CD36 expression using FACS.

543 (B) Tip epithelial cells cultured with, or without, SMAD inhibition for 3 weeks. The self-renew  
544 medium condition (w/ SMADi; *lower* panel) was used for positive control. Scale bar, 200  $\mu\text{m}$ .

545 (C, D) After 2 weeks growing in SMADi conditions, cells were transferred to culture medium  
546 containing CHIR, or FGFs, or CHIR/FGFs. After 2 weeks of exposure to the different culture  
547 conditions, the epithelial organoids were stained with lineage makers including SFTPC or TP63  
548 (C) and relative mRNA levels of *SFTPC* and TP63 were measured by qRT-PCR (D). Data were  
549 normalized to the Lin<sup>POS</sup> organoids; mean  $\pm$  SD of at least 4 biological replicates. Significance  
550 was evaluated by 1-way ANOVA with Tukey multiple comparison post-test; ns: not significant,  
551 \* $P < 0.05$ , \*\* $P < 0.01$  and \*\*\* $P < 0.001$ . Scale bar, 200  $\mu\text{m}$ .

552 (E) After 2 weeks growing in SMADi/FGFs (or SMADi/CHIR) the organoids were transferred  
553 to SMADi/CHIR (or SMADi/FGFs) for another 2 weeks. After 2 weeks of exposure to the  
554 different culture conditions organoid morphology altered and qRT-PCR for lineage markers  
555 was performed. Data were normalized to the Lin<sup>POS</sup> organoids; mean  $\pm$  SD of 3 biological  
556 replicates. Significance was evaluated by 1-way ANOVA with Tukey multiple comparison  
557 post-test; ns: not significant, \* $P < 0.05$ , \*\* $P < 0.01$  and \*\*\* $P < 0.001$ . Scale bar, 200  $\mu\text{m}$ .

558 (F and G) Tip epithelial cells cultured with FGF7, FGF10, or FGF7 and FGF10 (F); scale bar,  
559 200  $\mu\text{m}$ . After 2 weeks of exposure to each culture condition, the organoids were  
560 immunostained for SOX2, TP63 and E-cadherin (G); scale bar, 50  $\mu\text{m}$ .

561 (H) Gene expression profile of the freshly isolated lung epithelial cells from the canalicular  
562 stage human lung tissues sorted by CD44<sup>+</sup>CD36<sup>+</sup>, CD44<sup>+</sup>CD36<sup>-</sup> and CD44<sup>-</sup>CD36<sup>-</sup>. Data  
563 normalized to freshly isolated EPCAM<sup>+</sup> cells from 20 pcw tip tissues; mean  $\pm$  SD of 5  
564 biological replicates aged from 15~20 pcw. Significance was evaluated by 1-way ANOVA  
565 with Tukey multiple comparison post-test; ns: not significant, \* $P < 0.05$ , \*\* $P < 0.01$  and  
566 \*\*\* $P < 0.001$ .

567 (I) Frozen sections of human fetal lung tissues at 20 pcw were stained for ACTA2 followed by  
568 *in situ* HCR for *SFTPC* and *AXIN2*.

569

570 **Fig. 4. Spatial patterning of the differentiating alveolar epithelium by NOTUM+**



571 **myofibroblasts.**

572 (A-C) Frozen sections of 15-17 pcw human fetal lung stained by *in situ* HCR and/or antibodies.  
573 A. 16 pcw, *SFTPC*, *WNT2*, and *FGFR4* probes. B. 15 pcw, *SFTPC* and *NOTUM* probes,  
574 ACTA2 antibody. C. 17 pcw *SFTPC*, *WNT2*, and *NOTUM* probes. Arrows (B) and asterisks  
575 (A,C) represent ACTA2<sup>+</sup>NOTUM<sup>+</sup> myofibroblasts in the tissues. Lines and dashed lines  
576 indicate the boundaries of epithelial cells and myofibroblasts, respectively. Scale bar, 50  $\mu$ m.

577 (D) Isolation of PDGFRA<sup>+</sup>CD141<sup>+</sup> myofibroblasts and PDGFRA<sup>-</sup>CD141<sup>-</sup> alveolar fibroblasts  
578 from human fetal lung tissues at 17-21 pcw using a combination of PDGFRA-APC and CD141-  
579 PE antibodies.

580 (E) qRT-PCR of PDGFRA<sup>+</sup>CD141<sup>+</sup> myofibroblasts and PDGFRA<sup>-</sup>CD141<sup>-</sup> alveolar fibroblasts  
581 freshly isolated from 17 to 21 pcw human lung tissues. Data was normalized to the total isolated  
582 fibroblast population; mean  $\pm$  SD of biological 4 replicates. Significance was evaluated by  
583 unpaired student *t*-test; \**P*<0.05, \*\**P*<0.01, \*\*\**P*<0.001.

584 (F) Diagram illustrating *in vitro* coculture of the isolated PDGFRA<sup>+</sup>CD141<sup>+</sup> myofibroblasts and  
585 PDGFRA<sup>-</sup>CD141<sup>-</sup> alveolar fibroblast with Lin<sup>POS</sup> tip organoids expressing *SFTPC-GFP*.

586 (G and H) *SFTPC-GFP* signal of Lin<sup>POS</sup> tip organoids. G. Cultured alone in self-renewing (SN)  
587 or DMEM + 2% FBS medium. H. Cocultured with freshly isolated fibroblast sub-populations.  
588 I, insert; P, plate. Scale bar, 200  $\mu$ m.

589 (I) qRT-PCR for *SFTPC* and *LAMP3*, 2 weeks after *in vitro* culture. Mean  $\pm$  SD of 3 biological  
590 replicates. Significance was evaluated by one-way ANOVA; ns: not significant, \**P*<0.05,  
591 \*\**P*<0.01, \*\*\**P*<0.001.

592 (J) Thick sections of human fetal lung immunostained with ACTA2 followed by *in situ* HCR  
593 for *SFTPC*. Lines and dashed lines in the inset indicate *SFTPC*<sup>+</sup> epithelial cell populations  
594 located in tip and stalk regions, respectively. Thickness: 42  $\mu$ m. See also Supplementary Video  
595 1.

596 (K) Summary diagram showing the spatial regulation of Wnt signalling mediated by  
597 ACTA2<sup>+</sup>PDGFRA<sup>+</sup>CD141<sup>+</sup> myofibroblasts in the distal regions of human lung tissues during  
598 the canalicular stage.

599 DAPI indicates nuclei. Scale bar, 50  $\mu$ m.

600

601 **Extended Data Fig. 5. Wnt-responsive NOTUM<sup>+</sup> myofibroblasts in the distal human fetal**  
602 **lung.**

603 (A-F) Human fetal lung sections at 17 (A, D, E) and 19 pcw (B, C, F). A. *SFTPC*, *WIF1*,  
604 *NOTUM*. B. ACTA2, *NOTUM*. C. *NOTUM*, *LEF1*. D. *SFTPC*, *AXIN2*. E. CD44, ACTA2,  
605 PDGFRA. F. ACTA2, CD44, CD141. Arrows and asterisks indicate ACTA2<sup>+</sup> PDGFRA<sup>+</sup>  
606 *NOTUM*<sup>+</sup> myofibroblasts. Lines and dashed lines indicate the boundaries of epithelial cells and  
607 myofibroblasts, respectively.

608 (G) Relative mRNA levels from myofibroblasts and alveolar fibroblasts cultured alone, or  
609 cocultured in transwells. Data were normalized to the whole freshly isolated lung fibroblast  
610 population; mean  $\pm$  SD of biological 4 replicates. Significance was evaluated by unpaired  
611 student *t*-test; \**P*<0.05, \*\**P*<0.01, \*\*\**P*<0.001.

612 DAPI indicates nuclei. Scale bar, 50  $\mu$ m.

613

614 **Fig. 5. Identification of key transcription factors controlling airway and alveolar lineage**

615 **differentiation using the organoid system.**

616 (A) Genomic distribution of differentially accessible chromatin regions associated with human  
617 fetal lung development between the pseudoglandular and Lin<sup>POS</sup> organoids.

618 (B) Representative ATAC-seq tracks visualized in Integrative Genomics Viewer (IGV) at  
619 *SFTPC*, *TP63*, *AXIN2* and *CTNNB1*. Red box indicates the promoter.

620 (C and D) HOMER motif analysis coupled with RNA seq data. The top 15 most highly enriched  
621 motifs and TF gene expression level (heat map) are shown for the pseudoglandular (C) and  
622 Lin<sup>POS</sup> organoids (D).

623 (E) Pseudoglandular and Lin<sup>POS</sup> organoids stained with antibodies against NKX2.1, TFAP2C,  
624 CD44 and E-cadherin.

625 (F) Diagram showing doxycycline-inducible overexpression of NKX2.1 and/or TFAP2C in the  
626 pseudoglandular organoids. Constitutively expressed TagRFP was used for sorting transduced  
627 cells.

628 (G) Morphology of the pseudoglandular organoids overexpressing NKX2.1 or TFAP2C for 2  
629 weeks. Scale bar, 100  $\mu$ m.

630 (H) Relative mRNA levels of *SFTPC* and *TP63* were measured by qRT-PCR in NKX2.1- or  
631 TFAP2C-OE pseudoglandular organoids. Data was normalized to EPCAM<sup>+</sup> cells freshly  
632 isolated from 20 pcw tip tissues; mean  $\pm$  SD of four biological replicates. Significance was  
633 evaluated by 1-way ANOVA with Tukey multiple comparison post-test; ns: not significant,  
634 \*\*\*\* $P < 0.0001$ .

635 (I and J) SFTPC and TP63 antibody staining of the pseudoglandular organoids overexpressing  
636 NKX2.1 or TFAP2C for 2 weeks (I). The proportion of the organoids positively stained in (J)  
637 was measured based on morphology and signal intensity. N= 4 biological replicates.

638 (K) qRT-PCR of the pseudoglandular organoids overexpressing NKX2.1 for 2 weeks. Data was  
639 normalized to EPCAM<sup>+</sup> cells freshly isolated from 20 pcw tip tissues; mean  $\pm$  SD of four  
640 biological replicates. Significance was evaluated by 1-way ANOVA with Tukey multiple  
641 comparison post-test; ns: not significant, \* $P < 0.05$ , \*\* $P < 0.01$ , \*\*\* $P < 0.001$  and \*\*\*\* $P < 0.0001$ .

642 (L) Knock-down (KD) of endogenous *NKX2.1* by CRISPR-dCas9-KRAB system. Data was  
643 normalized to EPCAM<sup>+</sup> cells freshly isolated from 20 pcw tip tissues; mean  $\pm$  SD of 5  
644 biological replicates. Significance was evaluated by 1-way ANOVA with Tukey multiple  
645 comparison post-test; ns: not significant, \* $P < 0.05$ , \*\* $P < 0.01$ , \*\*\* $P < 0.001$ , \*\*\*\* $P < 0.0001$ .

646 DAPI indicates nuclei. Scale bar, 50  $\mu$ m.

647

648 **Extended Data Fig. 6. Chromatin accessibility analysis of the pseudoglandular and Lin<sup>POS</sup>**  
649 **organoids.**

650 (A) Analysis of chromatin accessibility in the pseudoglandular and Lin<sup>POS</sup> organoids by bulk-  
651 ATAC seq. The number of differential accessible chromatin regions which differ between the  
652 organoids was identified; fold change  $> 2$  and FDR  $< 0.05$ .

653 (B) Pie charts representing the genomic distribution of global accessible chromatin regions in  
654 pseudoglandular organoids and Lin<sup>POS</sup> organoids.

655 (C) Biological Process-associated GO term analysis using the differential accessible chromatin  
656 regions highly enriched in the pseudoglandular organoids and Lin<sup>POS</sup> organoids.

657 (D and E) IGV image shots of representative ATAC seq tracks at loci showing differential  
658 accessible chromatin regions between pseudoglandular organoids and Lin<sup>POS</sup> organoids. Red

659 box indicates the promoter regions.

660

661 **Extended Data Fig. 7 NKX2.1 drives the onset of the alveolar program whilst suppressing**  
662 **the airway program**

663 (A and B) *In situ* HCR images for detecting transcripts, *SFTPC* or *TFAP2C* with *NKX2.1* at 19  
664 pcw.

665 (C) Transgene induction following doxycycline treatment for 2 weeks measured by qRT-PCR.  
666 Data was normalized to the untreated group; mean  $\pm$  SD of four biological replicates.  
667 Significance was evaluated by 1-way ANOVA with Tukey multiple comparison post-test; ns:  
668 not significant, \*\*\*\* $P < 0.0001$ .

669 (D) qRT-PCR of the pseudoglandular organoids overexpressing *TFAP2C* for 2 weeks. Data  
670 was normalized to *EPCAM*<sup>+</sup> positive cells freshly isolated from 20 pcw tip tissues; mean  $\pm$  SD  
671 of biological 4 replicates. Significance was evaluated by 1-way ANOVA with Tukey multiple  
672 comparison post-test; ns: not significant, \* $P < 0.05$ , \*\* $P < 0.01$ , \*\*\* $P < 0.001$  and \*\*\*\* $P < 0.0001$ .

673 (E) Morphology and fluorescent images of pseudoglandular organoids overexpressing both  
674 *NKX2.1* and *TFAP2C* for 2 weeks.

675 (F) qRT-PCR of endogenous *NKX2.1*, *SFTPC*, and *TP63* in the *Lin*<sup>POS</sup> organoids cultured in  
676 medium containing CHIR, FGF7 or CHIR/FGF7. Data was normalized to *EPCAM*<sup>+</sup> cells  
677 freshly isolated from 20 pcw tip tissues; mean  $\pm$  SD of three biological replicates. Significance  
678 was evaluated by 1-way ANOVA with Tukey multiple comparison post-test; ns: not significant,  
679 \* $P < 0.05$ , \*\* $P < 0.01$ , \*\*\* $P < 0.001$ , \*\*\*\* $P < 0.0001$ .

680 DAPI indicates nuclei. Scale bar, 50  $\mu$ m.

681

682 **Fig. 6. Analysis of naturally occurring human genetic variation using organoid assays.**

683 (A and B) Morphology (A) and gene expression profile (B) in the pseudoglandular organoids  
684 overexpressing wildtype *NKX2.1*, or a *NKX2.1* lacking a DNA binding domain (DBD  
685 deletion), cultured for 2 weeks in the presence, or absence, of doxycycline ( $\pm$ DOX).

686 (C) Diagram describing overexpression of wild type and mutant forms of *NKX2.1* in the  
687 pseudoglandular organoids using doxycycline inducible lentiviral system. Individually, five  
688 different mutations were introduced into the DNA-binding homeobox domain; deletion of  
689 Arg<sup>162</sup> (R162del)<sup>14</sup>, two nonsense point mutations (Q175\*, R178\*)<sup>14</sup>, and two missense point  
690 mutations (I207F, I207M)<sup>12,13</sup> were tested.

691 (D-F) Morphology and immunostaining (D), qRT-PCR (E), and western blot (F) analysis of the  
692 pseudoglandular organoids following overexpression of wildtype or mutant human *NKX2.1*  
693 for 1 week. Data were normalized to doxycycline-non-treated lines; mean  $\pm$  SD of 4 biological  
694 replicates. Significance was evaluated by 1-way ANOVA with Tukey multiple comparison  
695 post-test; \* $P < 0.05$ , \*\* $P < 0.01$ , \*\*\* $P < 0.001$ . Western blot showing mature SFTPB and SFTPC.  
696 GAPDH was used for a loading control. DAPI indicates nuclei. Scale bar, 50  $\mu$ m.

697

698 **Fig. 7. Efficient *in vitro* differentiation of *Lin*<sup>POS</sup> organoids to alveolar type 2 cell fate.**

699 (A) qRT-PCR for *ACE2* in the pseudoglandular organoids overexpressing *NKX2.1* or *TFAP2C*  
700 for 1 or 2 weeks. Data was normalized to fresh *EPCAM*<sup>+</sup> cells from 20 pcw tip tissues; mean  
701  $\pm$  SD of four biological replicates. Significance was evaluated by 1-way ANOVA with Tukey  
702 multiple comparison post-test; \* $P < 0.05$ , \*\* $P < 0.01$ , \*\*\* $P < 0.001$ .

703 (B) qRT-PCR of the Lin<sup>POS</sup> organoids cultured in SN medium or alveolar-induction culture  
704 conditions containing combinations of DAPT, Dexamethasone/cyclic AMP/ IBMX (DCI),  
705 CHIR with/without SB431542 (SB) and FGF7, for 1 week. *NKX2.1*, *SFTPC*, and *SOX9* levels  
706 were normalized to EPCAM<sup>+</sup> cells, and *ACE2* was normalized to EPCAM<sup>-</sup> cells, freshly sorted  
707 from 20 pcw tip tissues; mean ± SD of four biological replicates. Significance was evaluated  
708 by 1-way ANOVA with Dunnett multiple comparison post-test; \**P*<0.05, \*\**P*<0.01,  
709 \*\*\**P*<0.001.

710 (C) Morphology and fluorescent images of the Lin<sup>POS</sup> organoids cultured in DAPT/DCI/CHIR  
711 with SB, or in control SN medium, for 1 week.

712 (D) Immunofluorescent analysis of *SFTPC*-GFP<sup>+</sup> Lin<sup>POS</sup> organoids cultured in  
713 DAPT/DCI/CHIR with SB or in the SN medium for 1 week. DAPI indicates nuclei. Scale bar,  
714 50 μm.

715 (E) qRT-PCR of *NKX2.1* and *SFTPC* in the pseudoglandular organoids cultured in the SN  
716 medium or in DAPT/DCI/CHIR plus SB. Data were normalized to EPCAM<sup>+</sup> cells freshly  
717 isolated from 20 pcw tip tissues; mean ± SD of three biological replicates. Significance was  
718 evaluated by 1-way ANOVA with Tukey multiple comparison post-test; \*\*\*\**P*<0.0001.

719 (F) Electron microscopy images of Lin<sup>POS</sup> organoids cultured in DAPT/DCI/CHIR with SB  
720 (*left*) or SN medium (*right*). LBs, lamellar bodies; PC, projection core; MV, microvilli; GC,  
721 glycogen; PLM, Primitive lipid membrane within a pool of monoparticulate glycogen at an  
722 early stage in the formation of LBs. Scale bar, 3 μm.

723 (G) Numbers of LBs per cells in Lin<sup>POS</sup> organoids cultured in SN medium (*red*) or  
724 DAPT/DCI/CHIR with SB (*blue*). Immature and mature LBs were measured in total 40 cells  
725 from two biological samples for each condition. Significance evaluated by unpaired student *t*-  
726 test; \**P*<0.05, \*\**P*<0.01, \*\*\**P*<0.001, \*\*\*\**P*<0.0001.

727 (H) Western blot showing NKX2.1 levels and SFTPB/SFTPC processing in the Lin<sup>POS</sup>  
728 organoids cultured in the SN medium, or in DAPT/DCI/CHIR/SB and the pseudoglandular  
729 organoids cultured in the SN medium for 1 week. GAPDH was used for a loading control.

730 (I) Chromatin immunoprecipitation (ChIP)-qPCR analysis for quantifying relative enrichment  
731 of NKX2.1 binding on the promoter regions of type 2 alveolar lineage markers, *SFTPC*,  
732 *LAMP3*, and *SLC34A2* in the organoids cultured in the SN medium, or in DAPT/DCI/CHIR  
733 plus SB. Data was normalized to the IgG control; mean ± SD of three biological replicates.

734

735 **Extended Data Fig. 8. Type 2 alveolar differentiation of the cultured canalicular stage tip**  
736 **cells.**

737 (A and B) Immunofluorescent analysis of ACE2 in (A) pseudoglandular organoids  
738 overexpressing NKX2.1 and (B) Lin<sup>POS</sup> organoids were cultured in DAPT/DCI/CHIR/SB or in  
739 the SN medium for 1 week. Phalloidin (F-actin) marks apical membrane of epithelial cells in  
740 the organoids. Scale bar, 50 μm.

741 (C) qRT-PCR of Lin<sup>POS</sup> organoids cultured in the SN medium or in DAPT/DCI/CHIR with SB,  
742 or A83-01, for 1 week. Data were normalized to EPCAM<sup>+</sup> cells freshly isolated from 20 pcw  
743 tip tissues; mean ± SD of four biological replicates. Significance was evaluated by 1-way  
744 ANOVA with Tukey multiple comparison post-test; \**P*<0.05, \*\**P*<0.01, \*\*\**P*<0.001.

745

746



## 747 **MATERIALS and METHODS**

### 748 **Human embryonic and foetal lung tissue**

749 Human embryonic and foetal lung tissues were provided from terminations of pregnancy from  
750 Cambridge University Hospitals NHS Foundation Trust under permission from NHS Research  
751 Ethical Committee (96/085) and the MRC/Wellcome Trust Human Developmental Biology  
752 Resource (London and Newcastle, University College London (UCL) site REC reference:  
753 18/LO/0822; Newcastle site REC reference: 18/NE/0290; Project 200454; [www.hdbr.org](http://www.hdbr.org)).  
754 Sample age ranged from 4 to 23 weeks of gestation (post-conception weeks; pcw). Stages of  
755 the samples were determined according to their external physical appearance and  
756 measurements. All the samples used for the current study had no known genetic abnormalities.

### 757 ***In vitro* culture of human fetal lung organoids**

758 The isolated tip epithelial cells were embedded in Matrigel (Corning, 356231) and cultured in  
759 48-well plates in self-renewal (SN) medium: Advanced DMEM/F12 supplemented with 1x  
760 GlutaMax, 1 mM HEPES and Penicillin/Streptomycin, 1X B27 supplement (without Vitamin  
761 A), 1X N2 supplement, 1.25 mM n-Acetylcysteine, 50 ng/ml recombinant human EGF  
762 (PeproTech, AF-100-15), 100 ng/ml recombinant human Noggin (PeproTech, 120-10C), 100  
763 ng/ml recombinant human FGF10 (PeproTech, 100-26), 100 ng/ml recombinant human FGF7  
764 (PeproTech, 100-19), 3  $\mu$ M CHIR99021 (Stem Cell Institute, University of Cambridge) and 10  
765 mM SB431542 (Bio-Techne, 1614). The culture medium was replaced every 2 days and the  
766 organoids were usually split 1:3 once per week by breaking them into small fragments.  
767 Numbers of replicates are indicated in figure legends. 10 ng/ $\mu$ l recombinant human BMP4  
768 (Peprotech, 120-05) and 10 ng/ $\mu$ l recombinant human TGF- $\beta$ 1 (Peprotech, 100-21) were added  
769 to the medium instead of adding SB431542 and Noggin to activate dual SMAD signalling  
770 (Extended Data Fig. 4B).

771 To perform *in vitro* co-culture experiments, freshly sorted  $2 \times 10^5$  PDGFRA<sup>+</sup>CD141<sup>+</sup>  
772 myofibroblasts or PDGFRA<sup>-</sup>CD141<sup>-</sup> fibroblasts were mixed with *SFTPC*-eGFP<sup>+</sup> Lin<sup>POS</sup>  
773 organoids in 100  $\mu$ l Matrigel and then loaded into an insert of transwell (Merck, CLS3493).  
774 On the bottom well plates, coated with Collagen (Merck, CLS3493),  $4 \times 10^5$  PDGFRA<sup>-</sup>CD141<sup>-</sup>  
775 fibroblasts were plated in the culture medium containing 2% fetal bovine serum (FBS; Thermo,  
776 10500064) in the Advanced DMEM/F12 supplemented with 1x GlutaMax, 1 mM HEPES and  
777 Penicillin/Streptomycin. 100  $\mu$ l culture medium was added every 2 days. For coculture of  
778 PDGFRA<sup>+</sup>CD141<sup>+</sup> myofibroblasts with PDGFRA<sup>-</sup>CD141<sup>-</sup> fibroblasts,  $2 \times 10^5$  of  
779 PDGFRA<sup>+</sup>CD141<sup>+</sup> myofibroblasts were plated on the insert and  $4 \times 10^5$  of PDGFRA<sup>-</sup>CD141<sup>-</sup>  
780 fibroblasts were plated on the bottom well plate. After 2 weeks of co-cultures the organoids, or  
781 the mesenchymal cells, were harvested for further analysis.

782

### 783 **Isolation of tip epithelial cells, myofibroblasts, and alveolar fibroblasts**

784 For isolation of CD44<sup>+</sup>, or CD44<sup>+</sup>CD36<sup>+</sup>, tip epithelium directly from the distal lung tissues,  
785 the tissues were finely dissected into tiny pieces and enzymatically digested into single cells  
786 by incubating them in a dissociation solution containing 0.125 mg/ml Collagenase (Merck,  
787 C9891), 1 U/ml Dispase (Thermo Fisher Scientific, 17105041) and 0.1 U/ $\mu$ l DNAase (Merck,  
788 D4527), in a rotating incubator for 1 h at 37°C. After rinsing in washing buffer containing 2%  
789 FBS in cold PBS the cells were filtered by 100  $\mu$ m strainer and harvested by centrifugation.  
790



791 The cell pellets were resuspended and treated with RBC lysis buffer (BioLegend, 420301).  
792 Next, the cells were rinsed in the washing buffer and then incubated with primary antibodies  
793 against CD45 (1:100; PE-Cy7 conjugated, Thermo Fisher Scientific, 25-9459-42), CD31  
794 (1:100; PE-Cy7 conjugated, Thermo Fisher Scientific, 25-0319-42), EPCAM (1:100; PE-  
795 conjugated; BioLegend, 324206), CD44 (1:200; APC-conjugated; BioLegend, 103012), and  
796 CD36 (1:100; FITC, conjugated; Thermo Fisher Scientific, 11-0369-42), with a viability dye,  
797 Zombie (Biolegend, 423113) for 25 min on ice. Following removal of dead cells and  
798 immune/endothelial cells, the EPCAM<sup>+</sup> epithelial cells were sorted by CD44 and/or CD36  
799 expression by FACS (BD Influx™ Cell Sorter) (Fig. 1G).

800 Alternatively, the tip epithelial cells were isolated by EPCAM<sup>+</sup> magnetic-activated cell  
801 sorting (MACS) beads according to the manufacturer's instruction (CD326 MicroBeads,  
802 human, Miltenyi Biotec) from the distal lung tissues. Then, the enriched EPCAM<sup>+</sup> epithelial  
803 cells were sorted by CD44 and/or CD36 expression by FACS (SH800S Cell Sorter) to more  
804 purely enrich the tip cell population (Fig. 2A).

805 To purify myofibroblasts and alveolar fibroblasts, the single cells dissociated from the  
806 distal lung tissues were incubated with the following primary antibodies: CD45 (1:100; PE-  
807 Cy7 conjugated, Thermo Fisher Scientific, 25-9459-42), CD31 (1:100; PE-Cy7 conjugated,  
808 Thermo Fisher Scientific, 25-0319-42), CD9 (1:100; PE-Cy7 conjugated, BioLegend, 312115),  
809 EPCAM (1:100; FITC-conjugated, 324204), PDGFRA (1:100; APC-conjugated, BioLegend,  
810 313511), CD141 (1:100; PE-conjugated, BioLegend, 344104), with the viability dye, Zombie  
811 (Biolegend, 423113). After removing dead cells, immune/endothelial cells, airway smooth  
812 muscle cells, and epithelial cells, the cells are sorted by PDGFRA and/or CD141 expression  
813 using BD Influx Cell Sorter. The sorted cells were directly applied to an organoid coculture or  
814 a gene expression analysis.

815

## 816 **Type 2 alveolar differentiation of Lin<sup>POS</sup> organoids**

817 The Lin<sup>POS</sup> organoids were embedded in Matrigel and cultured for 7 days in alveolar type 2  
818 (AT2) differentiation medium: Advanced DMEM/F12 supplemented with 1x GlutaMax, 1 mM  
819 HEPES and Penicillin/Streptomycin, 1X B27 supplement (without Vitamin A), 1x N2  
820 supplement, 1.25 mM n-Acetylcysteine, 10mM CHIR99021, 50 μM Dexamethasone (Merck,  
821 D4902), 0.1 M 8-Bromoadenosine 3'5'-cyclic monophosphate (cAMP; Merck, B5386), 0.1 M  
822 3-Isobutyl-1-methylxanthine (IBMX; Merck, 15679), 50 mM DAPT (Merck, D5942) with 10  
823 mM SB431542 or 10 mM A83-01 (Tocris, 2939). The culture medium was replaced every 2  
824 days without passaging.

825

## 826 **Lentiviral transduction**

827 To introduce a reporter system into the tip epithelial cells, the lentiviral vector pHAGE hSPC-  
828 eGFP-W given from Darrell Kotton (Addgene plasmid # 36450; <http://n2t.net/addgene:36450>;  
829 RRID: Addgene\_36450) was modified by inserting EF1a-promoter TagRFP cassette. The tip  
830 epithelial cells were infected with the modified lentiviral vector for 24 h at 37°C in a single  
831 cell suspension in the SN medium containing 10 μM Y-27632 (Merck, 688000). After 24 h,  
832 the cells were embedded to the Matrigel and cultured in the SN medium containing 10 μM Y-  
833 27632 for another 48 h to support single cell survival. The cultured cells were further sorted by  
834 eGFP/TagRFP signals to enrich the infected cells.

835 For overexpressing NKX2.1 and/or TFAP2C, Tet-ON 3G doxycycline (Dox)-  
836 inducible lentiviral vector (Takara, 631337) was modified by inserting EF1a-TagRFP-2A-  
837 tet3G with tetON-NKX2-1 CDS, or by inserting EF1a-mNeonGreen-2A-tet3G with tetON-  
838 TFAP2C CDS. For generating NKX2.1 variants, naturally occurring mutations in NKX2.1  
839 binding domain region was selected from Leiden Open Variation Database 3.0<sup>14</sup>  
840 ([www.lovd.nl/3.0](http://www.lovd.nl/3.0)) and two previously reported clinical cases<sup>12,13</sup> – 1 amino acid deletion<sup>14</sup>  
841 (p.R162del), two nonsense point mutations<sup>14</sup> (p.Q175\* and p.R178\*), and two missense point  
842 mutations<sup>12,13</sup> (p.I207F and p.I207M). NKX2.1 CDS harbouring each mutation was amplified  
843 and inserted by Infusion (638909, Takara) cloning into the tetON-NKX2.1/EF1a-TagRFP-2A-  
844 tet3G Dox-inducible lentiviral vector. NKX2.1 CDS lacking the entire DNA binding domain  
845 was inserted into the EF1a-TagRFP-2A-tet3G Dox-inducible lentiviral vector by Infusion  
846 cloning.

847 For the NKX2.1 knock-down experiment, a modified Dox-inducible CRISPRi vector was  
848 gifted<sup>23</sup>; N-terminal KRAB-dCas9 (a gift from Bruce Conklin, Addgene plasmid # 73498)  
849 fused with a destabilising domain, dihydrofolate reductase (DHFR) sequence that is only  
850 stabilised by trimethoprim (TMP) treatment, was sub-cloned into the EF1a-TagRFP-2A-tet3G  
851 Dox-inducible lentiviral vector<sup>23</sup>. Treatment of 2 µg/ml Dox (Merck, D9891) with 10 nmol/L  
852 TMP (Merck, 92131) in the SN medium stabilize the functional KRAB-dCas9 protein. Three  
853 gRNAs targeting NKX2.1<sup>24</sup> were individually subcloned into gRNA lentivirus as follows:  
854 gRNA-1; 5'-GTCTGACGGCGGCAGAAGAG-3', gRNA-2; 5'-  
855 GGACCAACAGTGCGGCCCA-3', gRNA-3; 5'-GAAATGAGCGAGCGAGTCTG-3'.  
856 Single cells dissociated from organoids were infected and the infected cells were sorted by  
857 TagRFP and/or mNeonGreen fluorescent signal using FACS (Fig. 5) after 48 h of infection.  
858 The sorted TagRFP<sup>+</sup> and/or mNeonGreen<sup>+</sup> cells were cultured in the Matrigel in the absence  
859 of Dox or TMP for 1 week. After the cells were grown into a typical organoid, the Dox and/or  
860 TMP were added and culture continued for additional 2 weeks.

861

## 862 **Immunostaining of organoids and lung tissues**

863 For immunostaining of human lung tissue sections, the lungs were fixed in 4%  
864 paraformaldehyde (PFA; Merck, 158127) overnight, washed in PBS and 15%, 20% and 30%  
865 sucrose (w/v) in PBS before embedding in Optimum Cutting Temperature (OCT) medium  
866 (Merck, F4680). 12 µm thick frozen sections were collected and permeabilised using 0.3%  
867 Triton-X in PBS for 15 min. Antigen retrieval was performed by heating the slides in 10 mM  
868 Na-Citrate buffer at pH 6.0 in a microwave for 5 min. Then slides were treated with blocking  
869 solution containing 5% NDS, 1% Bovine Serum Albumin (BSA), 0.1% Triton-X in PBS at  
870 room temperature for 1 h.

871 For whole-mount immunostaining of lung organoids, the Matrigel was completely  
872 removed from the cultured organoids using Cell Recovery Solution (Corning, 354253) and  
873 fixed in 4% PFA for 30 min on ice. After rinsing in PBS washing solution containing 0.2%  
874 (v/v) Triton X-100 and 0.5% (w/v) BSA, the samples were transferred to a round-bottom 96  
875 well plate and incubated in permeabilization/blocking solution containing 0.2% (v/v) Triton X-  
876 100, 1% (w/v) BSA, and 5% normal donkey serum (NDS) in PBS, overnight at 4°C.

877 For primary antibody treatment, the following antibodies were treated to the organoids  
878 and the tissue slices at 4°C overnight: proSFTPC (1:200; Merck, AB3786), E-cadherin (1: 500;

879 Thermo Fisher Scientific, 13-1900), NKX2.1 (1:200; Merck, 07-601), TFAP2C (1:200; Abcam,  
880 ab218107), CD44 (1:200; Thermo Fisher Scientific, 17-0441-82), CD36 (1:200; Proteintech,  
881 18836-1-AP), alpha-smooth muscle actin (1:500; Thermo Fisher Scientific, MA1-06110),  
882 ACE2 (1:100; Abcam, ab108252), AXIN2 (1:200; R&D Systems, MAB6078), PDPN (1:200;  
883 R&D Systems, AF3670), CD31 (1:200; Abcam, ab9498), PDGFRA (1:200; Cell Signaling  
884 Technology, 3174), TP63 (1:200; Cell Signaling Technology, 13109), SOX2 (1: 500, Bio-  
885 techne, AF2018), SOX9 (1: 500, Merck, AB5535), LAMP3 (1:100; Atlas Antibodies,  
886 HPA051467), HTII-280 (1:200; Terracebiotech, TB-27AHT2-280), CD141 (1:100; PE-  
887 conjugated; BioLegend, 344104), ZO-1 (1:200; Invitrogen, 40-2200) and KI67 (1:200; BD  
888 Biosciences, 550609). After three washes with PBS, 97% (v/v) 2'-2'-thio-diethanol (TDE,  
889 Sigma, 166782) was treated for clearing. Images were collected under Leica SP8 confocal  
890 microscope.

891

### 892 ***In situ* hybridization chain reaction (*in situ* HCR)**

893 *In situ* HCR v3.0 was performed according to the manufacturer's procedure (Molecular  
894 Instruments<sup>25</sup>). Probes were designed according to the protocol and amplifiers with buffers  
895 were purchased from Molecular Technologies. Sequence information of the probes for  
896 detecting *SFTPC*, *WNT2*, *NOTUM*, *AXIN2*, *SOX9*, *FGFR4* and *TFAP2C* mRNA targets is  
897 listed in Supplementary Table 3. Briefly, frozen human tissue sections were cut at 20 μm from  
898 lungs fixed overnight in 4% PFA in DEPC-treated PBS and processed to cryoblocks. Lung  
899 sections were carefully rinsed in nuclease-free water, followed by 10 μg/mL proteinase K  
900 treatment (Thermo Fisher Scientific, AM2546), and 2 pmol of each probe was treated at 37°C  
901 overnight. After washing, the tissue was incubated with 6 pmol of the amplifiers at room  
902 temperature overnight for amplification. The amplifiers, consisting of a pair of hairpins  
903 conjugated to fluorophores, Alexa 546, 647, or 488, were snap-cooled separately and added at  
904 final 0.03 μM to the tissue. After removing excess hairpins in 5X SSC (sodium chloride sodium  
905 citrate) buffer containing 0.1% Triton X-100, nuclei were counter-stained with DAPI.

906 To combine *in situ* HCR with antibody immunostaining, the frozen human tissue sections  
907 from 20 μm up to 100 μm thickness were permeabilised using 0.3% Triton-X in DEPC-treated  
908 PBS for 20 min at room temperature. Then the tissues were treated with blocking solution  
909 containing 5% NDS, 1% BSA, 0.1% Triton-X in DEPC-treated PBS at 4°C for 3 h. After  
910 rinsing with cold DEPC-treated PBS, treated with a primary antibody against ACTA2 (1:500;  
911 Thermo Fisher Scientific, MA1-06110) for 24 h, followed by a secondary antibody treatment  
912 (1:500; Thermo Fisher Scientific, A10036) at 4°C overnight. After the tissue was washed three  
913 times in the DEPC-treated PBS at room temperature, 2 pmol of each *in situ* HCR probes for  
914 targeting *SFTPC* and *NOTUM* was treated at 37°C overnight without 10 μg/mL proteinase K  
915 treatment to preserve the antibody immunofluorescence. After washing, the tissues were  
916 incubated with 6 pmol of the amplifiers at room temperature overnight. Following three times  
917 of rinsing in in 5X SSC buffer containing 0.1% Triton X-100, nuclei were stained with DAPI.  
918 Finally, the tissues were processed to 2'-2'-thio-diethanol (TDE, Sigma, 166782) for clearing  
919 and mounting: 10 %, 25 %, 50 % (v/v) TDE in 1x DEPC-treated PBS for 1 hr and 97% TDE  
920 overnight at 4°C. Images were collected under Leica SP8 confocal microscope.

921

### 922 **RNA extraction, cDNA synthesis, qRT-PCR analysis, and bulk RNA-seq**

923 Organoids were removed from the Matrigel and lysed. Total RNA was extracted according to  
924 the RNeasy Mini Kit (Qiagen, 74004) protocol. For cells freshly purified from human lung  
925 tissues were directly lysed using 100 µl lysis buffer from PicoPure™ RNA Isolation Kit  
926 (Thermo Fisher Scientific, KIT0204). First Strand cDNA synthesis was performed using High-  
927 Capacity cDNA Reverse Transcription Kit (Applied Biosystems, 4368814). Then, cDNA was  
928 diluted 1:50 for qRT-PCR reaction (SYBR Green PCR Master Mix; Applied Biosystems,  
929 4309155). Primer sequence information is listed in Supplementary Table 4. Data is presented  
930 as fold change, calculated by ddCt method, using *ACTB* as housekeeping reference gene. For  
931 bulk RNA-seq, RNA quality was validated on Agilent 2200 TapeStation. The RNA-seq  
932 libraries were generated at the Cancer Research UK Cambridge Institute and sequenced on an  
933 Illumina HiSeq 4000. A list of differentially expressed genes was extracted using the counted  
934 reads and R package edgeR<sup>26</sup> version 3.16.5 for the 3 pairwise comparisons (Supplementary  
935 Table 1). GO biological processes term enrichment, KEGG pathway, and gene set enrichment  
936 analysis were performed using DAVID<sup>27</sup>, Enrichr<sup>28</sup>, and R package fgsea package<sup>29</sup>,  
937 respectively.

938

### 939 **Immunoblotting**

940 The organoid samples were harvested and lysed (RIPA buffer; Merck, R0278) after complete  
941 removal of the Matrigel and run on 12.5 ~ 20 % SDS PAGE gels. Proteins on the gels were  
942 transferred onto PVDF membrane using BioRad Mini Trans-Blot system (BioRad, Mini Trans-  
943 Blot® Cell). The membranes were washed with pure water and blocked with 5% skimmed milk  
944 in 0.1% Tween-20/PBS (PBST) for 30 min at room temperature. Membranes were incubated  
945 with primary antibodies against NKX2.1 (1:200; Merck, 07-601), proSFTPC (1:1000; Merck,  
946 AB3786), mature SFTPC (1:1000; Seven Hills Rioreagents, WRAB-76694), mature SFTPB  
947 (1:1000; Seven Hills Rioreagents, WRAB-48604), and GAPDH (1:5000; Abcam, ab8245) in  
948 the blocking buffer overnight at 4 °C. After washing with PBST, secondary antibodies  
949 conjugated with fluorescence dyes (1:5000; anti-mouse IRDye® 800CW and anti-rabbit  
950 IRDye® 680RD; Abcam, ab216774 and ab216779, respectively) were treated at room  
951 temperature for 3 h. The membranes were washed in PBST and developed using Li-Cor  
952 Odyssey imaging system.

953

### 954 **Chromatin immunoprecipitation**

955 Chromatin immunoprecipitation (ChIP) was performed according to SimpleChIP® Chromatin  
956 immunoprecipitation protocol (Cell Signaling Technology, 9002). In brief, the organoids were  
957 harvested and enzymatically dissociated into single cells using TrypLE Express Enzyme  
958 (Thermo Fisher Scientific, 12605010). Then the cells were crosslinked with 1% formaldehyde  
959 for 15 min at room temperature and the reaction was quenched by glycine at a final  
960 concentration of 0.125 M. Chromatin was digested with 1 µl MNase (Cell Signaling  
961 Technologies, 10011S) for 20 min at 37°C, followed by sonication for 12 cycles of 30 seconds  
962 on and 30 seconds off using Biorupter (Diagenode, UCD-300), to length of an average size of  
963 150-900 bp. 5 µg of digested chromatin samples was treated with antibodies against rabbit IgG  
964 (1:100; Cell Signaling Technology, 2729) or NKX2.1 (1:100; Merck, 07-601). The amount of  
965 immunoprecipitated DNA was quantified by qPCR using primers specific for promoter regions  
966 of SFTPC, LAMP3, and SLC34A2. Fold enrichment values are presented as the fold-change



967 over the level of ChIP with negative control IgG antibody (ChIP signal/IgG signal). Sequence  
968 information of the primers for targeting SFTPC, LAMP3, and SLC34A2 promoter regions is  
969 listed in Supplementary Table 4.

970

### 971 **Bulk ATAC-seq**

972 Genome-wide chromatin accessibility of lung organoids was assessed as previously  
973 described<sup>30</sup>. In brief, 50,000 cells were harvested from organoids and lysed in lysis buffer (10  
974 mM Tris-HCl, pH 7.4, 10 mM NaCl, 3 mM MgCl<sub>2</sub>, 0.1% (v/v) IGEPAL CA-630). The lysate  
975 was treated in 50 µL reactions with Nextera TDE1 transposase (Illumina, 15027865) for 30  
976 min at 37°C. The purified DNA was amplified and indexed using Nexera DNA CD Indexes  
977 (Illumina, 20018707), and size distribution of the DNA libraries was analysed using High-  
978 sensitivity Qubit dsDNA Assay Kit (ThermoFisher, Q32851) and Agilent 2200 TapeStation.  
979 The libraries were sequenced on an Illumina HiSeq 4000. Peak calling was done using MACS2  
980 algorithm<sup>31</sup> (version 2.1.1) and further processed to extract differential peaks (Supplementary  
981 Table 2). Then, the differential peak data was further used for analysing transcription factor  
982 motifs using HOMER<sup>32</sup> software in combined with RNA-seq data.

983

### 984 **Electron microscopy imaging**

985 The organoid samples were fixed in 2 % formaldehyde/2 % glutaraldehyde in 0.05 M sodium  
986 cacodylate buffer (NaCAC), pH 7.4, containing 2 mM calcium chloride (Merck, C27902)  
987 overnight at 4°C. After washing in 0.05 M NaCAC at pH 7.4, the samples were osmicated for  
988 3 days at 4°C. After washing in deionised water (DIW), the samples were treated twice with  
989 0.1 % (w/v) thiocarbohydrazide (Merck, 223220) in DIW for each 20 min and 1 h at room  
990 temperature in the dark, followed by block-staining with uranyl acetate (2 % uranyl acetate in  
991 0.05 M maleate buffer pH 5.5) for 3 days at 4°C. Then, the samples were dehydrated in a graded  
992 series of ethanol (50%/70%/95%/100%/100% dry) 100% dry acetone and 100% dry  
993 acetonitrile, three times in each for at least 5 min. Next, the samples were infiltrated with a  
994 50:50 mixture of 100% dry acetonitrile/Quetol resin (TAAB, Q005) without BDMA (TAAB,  
995 B008) overnight, followed by 3 days in 100% Quetol without BDMA. The sample was  
996 infiltrated for 5 days in 100% Quetol resin with BDMA, exchanging the resin each day. The  
997 Quetol resin mixture is: 12 g Quetol 651, 15.7 g NSA (TAAB, N020), 5.7 g MNA (TAAB,  
998 M012) and 0.5 g BDMA. Samples were placed in embedding moulds and cured at 60°C for 3  
999 days.

1000 Thin sections were cut using an Ultracut E ultramicrotome (Leica) and mounted on  
1001 melinex plastic coverslips. The coverslips were mounted on aluminium SEM stubs using  
1002 conductive carbon tabs and the edges of the slides were painted with conductive silver paint.  
1003 Then, the samples were sputter coated with 30 nm carbon using a Quorum Q150 T E carbon  
1004 coater and imaged in a Verios 460 scanning electron microscope (FEI, Thermo Fisher  
1005 Scientific) at 4 keV accelerating voltage and 0.2 nA probe current in backscatter mode using  
1006 the concentric backscatter detector in immersion mode at a working distance of 3.5-4 mm;  
1007 1,536 x 1,024 pixel resolution, 3 µs dwell time, 4 line integrations. Stitched maps were acquired  
1008 using FEI MAPS software using the default stitching profile and 10% image overlap.

1009

### 1010 **Data availability**



1011 All bulk RNA-seq and ATAC-seq data generated have been deposited in NCBI's Gene  
1012 Expression Omnibus and are accessible through GEO Series accession number GSE178529.

1013

#### 1014 **Statistical analysis**

1015 Data are expressed as average  $\pm$  standard deviation (SD). Statistical significance was evaluated  
1016 by unpaired student's *t* test, 1- or 2-way ANOVA with Tukey/Bonferroni/ Dunnett comparison  
1017 multiple comparison post-test; ns: not significant, \* $P < 0.05$ , \*\* $P < 0.01$ , \*\*\* $P < 0.001$ , and  
1018 \*\*\*\* $P < 0.0001$ .

1019

1020

1021 **REFERENCES**

- 1022 1. Burri, P. H. Fetal and postnatal development of the lung. *Annu. Rev. Physiol.* **46**, 617–628  
1023 (1984).
- 1024 2. Nikolić, M. Z., Sun, D. & Rawlins, E. L. Human lung development: recent progress and  
1025 new challenges. *Development* **145**, (2018).
- 1026 3. Nikolić, M. Z. *et al.* Human embryonic lung epithelial tips are multipotent progenitors  
1027 that can be expanded in vitro as long-term self-renewing organoids. *Elife* **6**, (2017).
- 1028 4. Miller, A. J. *et al.* In Vitro Induction and In Vivo Engraftment of Lung Bud Tip Progenitor  
1029 Cells Derived from Human Pluripotent Stem Cells. *Stem Cell Reports* **10**, 101–119 (2018).
- 1030 5. McCauley, K. B. *et al.* Efficient Derivation of Functional Human Airway Epithelium from  
1031 Pluripotent Stem Cells via Temporal Regulation of Wnt Signaling. *Cell Stem Cell* **20**, 844-  
1032 857.e6 (2017).
- 1033 6. Little, D. R. *et al.* Differential chromatin binding of the lung lineage transcription factor  
1034 NKX2-1 resolves opposing murine alveolar cell fates in vivo. *Nat. Commun.* **12**, 2509  
1035 (2021).
- 1036 7. Guillot, L. *et al.* NKX2-1 mutations leading to surfactant protein promoter dysregulation  
1037 cause interstitial lung disease in “Brain-Lung-Thyroid Syndrome.” *Hum. Mutat.* **31**,  
1038 E1146-62 (2010).
- 1039 8. Attarian, S. J. *et al.* Mutations in the thyroid transcription factor gene NKX2-1 result in  
1040 decreased expression of SFTPB and SFTPC. *Pediatr. Res.* **84**, 419–425 (2018).
- 1041 9. Jacob, A. *et al.* Differentiation of Human Pluripotent Stem Cells into Functional Lung  
1042 Alveolar Epithelial Cells. *Cell Stem Cell* **21**, 472-488.e10 (2017).
- 1043 10. Travaglini, K. J. *et al.* A molecular cell atlas of the human lung from single-cell RNA  
1044 sequencing. *Nature* **587**, 619–625 (2020).
- 1045 11. Kakugawa, S. *et al.* Notum deacylates Wnt proteins to suppress signalling activity. *Nature*  
1046 **519**, 187–192 (2015).
- 1047 12. Gillett, E. S., Deutsch, G. H., Bamshad, M. J., McAdams, R. M. & Mann, P. C. Novel  
1048 NKX2.1 mutation associated with hypothyroidism and lethal respiratory failure in a full-  
1049 term neonate. *J. Perinatol.* **33**, 157–160 (2013).
- 1050 13. Maquet, E. *et al.* Lethal respiratory failure and mild primary hypothyroidism in a term girl  
1051 with a de novo heterozygous mutation in the TITF1/NKX2.1 gene. *J. Clin. Endocrinol.*  
1052 *Metab.* **94**, 197–203 (2009).
- 1053 14. Fokkema, I. F. A. C. *et al.* LOVD v.2.0: the next generation in gene variant databases.  
1054 *Hum. Mutat.* **32**, 557–563 (2011).
- 1055 15. Ochs, M. The closer we look the more we see? Quantitative microscopic analysis of the  
1056 pulmonary surfactant system. *Cell. Physiol. Biochem.* **25**, 27–40 (2010).
- 1057 16. Weaver, T. E., Na, C.-L. & Stahlman, M. Biogenesis of lamellar bodies, lysosome-related  
1058 organelles involved in storage and secretion of pulmonary surfactant. *Semin. Cell Dev.*  
1059 *Biol.* **13**, 263–270 (2002).
- 1060 17. Laresgoiti, U. *et al.* Lung epithelial tip progenitors integrate glucocorticoid- and STAT3-  
1061 mediated signals to control progeny fate. *Development* **143**, 3686–3699 (2016).
- 1062 18. Shannon, J. M., Nielsen, L. D., Gebb, S. A. & Randell, S. H. Mesenchyme specifies  
1063 epithelial differentiation in reciprocal recombinants of embryonic lung and trachea. *Dev.*  
1064 *Dyn.* **212**, 482–494 (1998).

- 1065 19. Frank, D. B. *et al.* Emergence of a Wave of Wnt Signaling that Regulates Lung  
1066 Alveologenesis by Controlling Epithelial Self-Renewal and Differentiation. *Cell Rep.* **17**,  
1067 2312–2325 (2016).
- 1068 20. Zepp, J. A. *et al.* Genomic, epigenomic, and biophysical cues controlling the emergence  
1069 of the lung alveolus. *Science* **371**, (2021).
- 1070 21. Mollaoglu, G. *et al.* The Lineage-Defining Transcription Factors SOX2 and NKX2-1  
1071 Determine Lung Cancer Cell Fate and Shape the Tumor Immune Microenvironment.  
1072 *Immunity* **49**, 764-779.e9 (2018).
- 1073 22. Li, L. *et al.* TFAP2C- and p63-Dependent Networks Sequentially Rearrange Chromatin  
1074 Landscapes to Drive Human Epidermal Lineage Commitment. *Cell Stem Cell* vol. 24 271-  
1075 284.e8 (2019).
- 1076 23. Sun, D., Evans, L., Lim, K. & Rawlins, E. L. A functional genetic toolbox for human  
1077 tissue-derived organoids. *bioRxiv* 2020.05.04.076067 (2021)  
1078 doi:10.1101/2020.05.04.076067.
- 1079 24. Horlbeck, M. A. *et al.* Compact and highly active next-generation libraries for CRISPR-  
1080 mediated gene repression and activation. *Elife* **5**, (2016).
- 1081 25. Choi, H. M. T. *et al.* Third-generation in situ hybridization chain reaction: multiplexed,  
1082 quantitative, sensitive, versatile, robust. *Development* **145**, (2018).
- 1083 26. Robinson, M. D., McCarthy, D. J. & Smyth, G. K. edgeR: a Bioconductor package for  
1084 differential expression analysis of digital gene expression data. *Bioinformatics* **26**, 139–  
1085 140 (2010).
- 1086 27. Huang, D. W., Sherman, B. T. & Lempicki, R. A. Systematic and integrative analysis of  
1087 large gene lists using DAVID bioinformatics resources. *Nat. Protoc.* **4**, 44–57 (2009).
- 1088 28. Xie, Z. *et al.* Gene Set Knowledge Discovery with Enrichr. *Curr Protoc* **1**, e90 (2021).
- 1089 29. Korotkevich, G. *et al.* Fast gene set enrichment analysis. *bioRxiv* 060012 (2021)  
1090 doi:10.1101/060012.
- 1091 30. Buenrostro, J. D., Wu, B., Chang, H. Y. & Greenleaf, W. J. ATAC-seq: A method for  
1092 assaying chromatin accessibility genome-wide. *Curr. Protoc. Mol. Biol.* **109**, 21.29.1-  
1093 21.29.9 (2015).
- 1094 31. Feng, J., Liu, T., Qin, B., Zhang, Y. & Liu, X. S. Identifying ChIP-seq enrichment using  
1095 MACS. *Nat. Protoc.* **7**, 1728–1740 (2012).
- 1096 32. Heinz, S. *et al.* Simple combinations of lineage-determining transcription factors prime  
1097 cis-regulatory elements required for macrophage and B cell identities. *Mol. Cell* **38**, 576–  
1098 589 (2010).

Fig. 1. Human fetal lung tip progenitor cells acquire alveolar features during normal development.

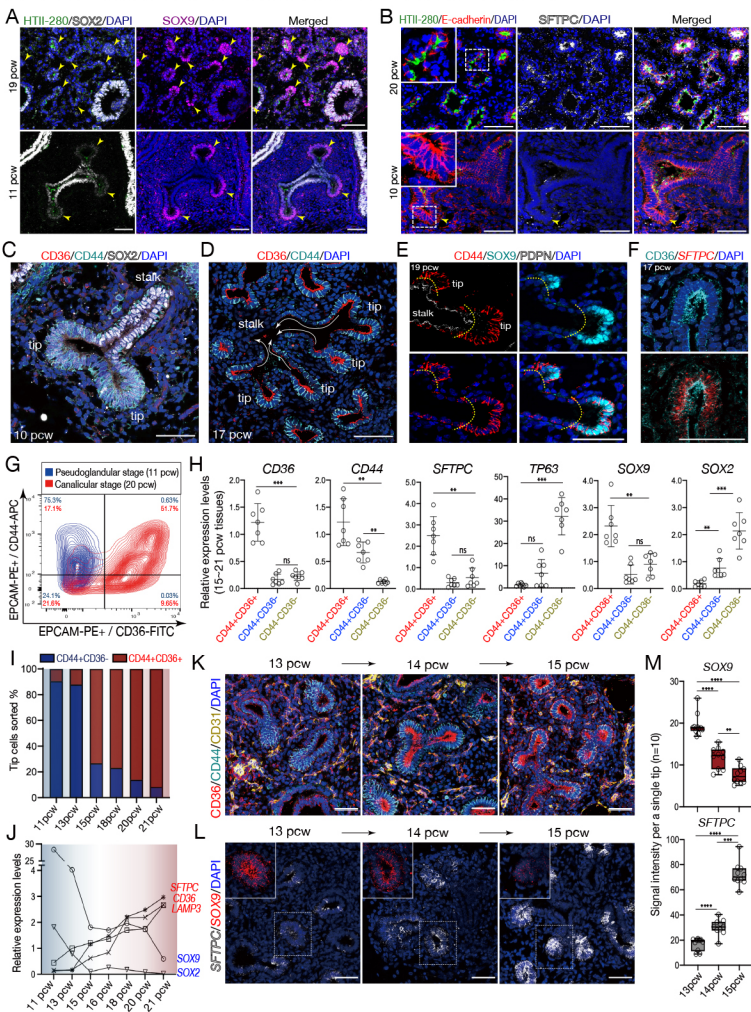

Fig. 2. CD36, CD44 dual-positive tip cells self-renew and undergo lineage commitment *in vitro* to form lineal stage lung organoids

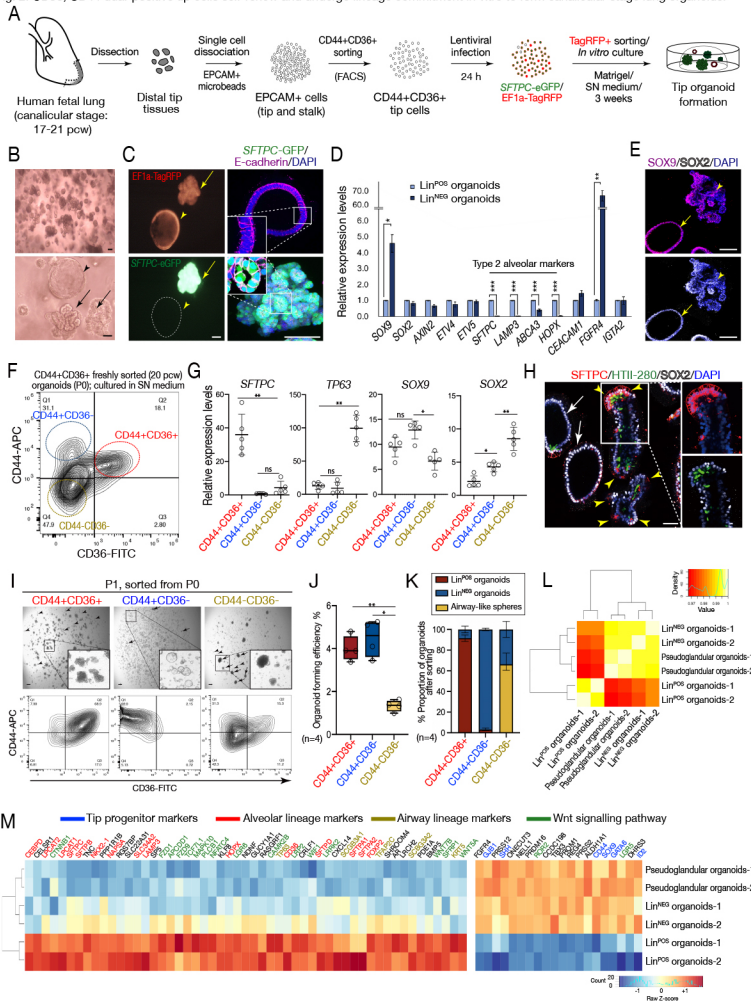



Fig. 3. Wnt and FGF signalling coordinate human tip cell maintenance and differentiation in vitro

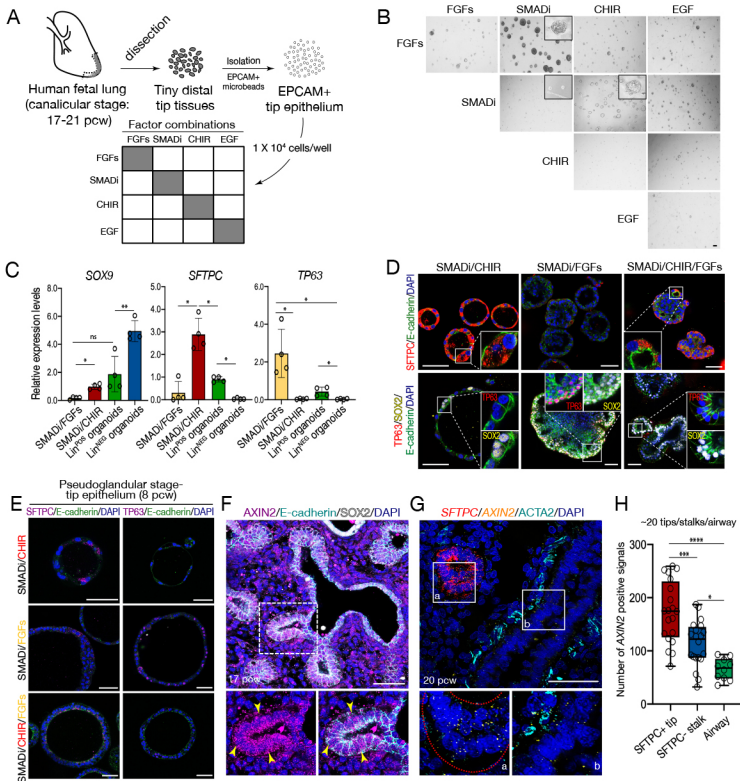

Fig. 4. Spatial patterning of the differentiating epithelium by NOTUM+ myofibroblasts

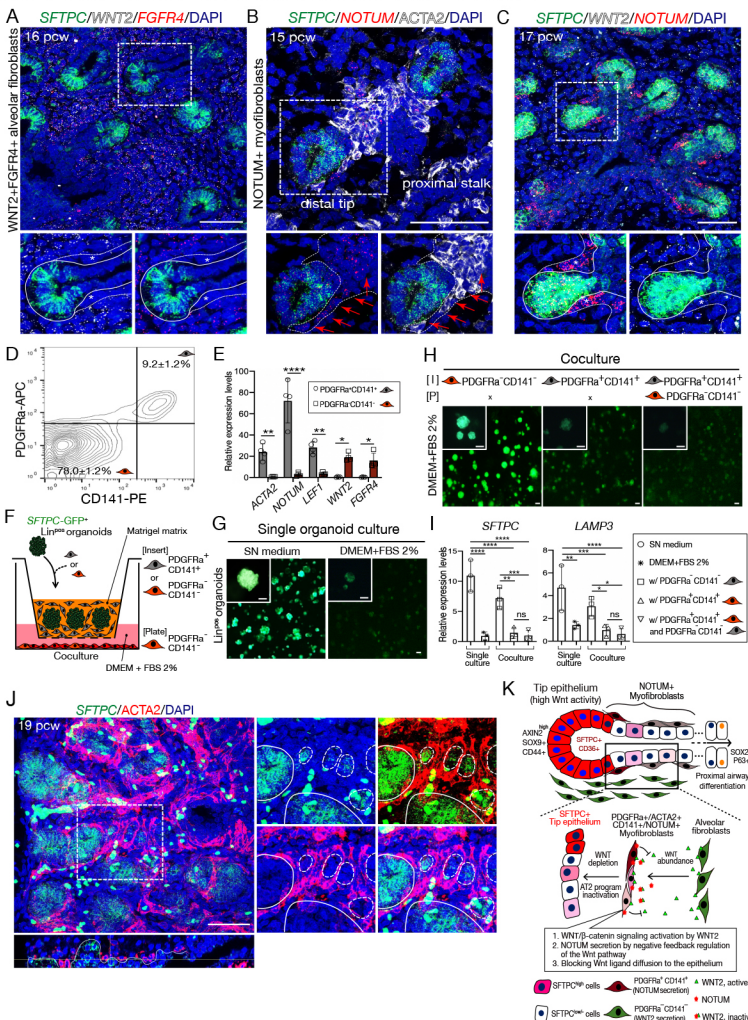

Fig. 5. Identification of key transcription factors controlling airway and alveolar lineage differentiation using the organoid system.

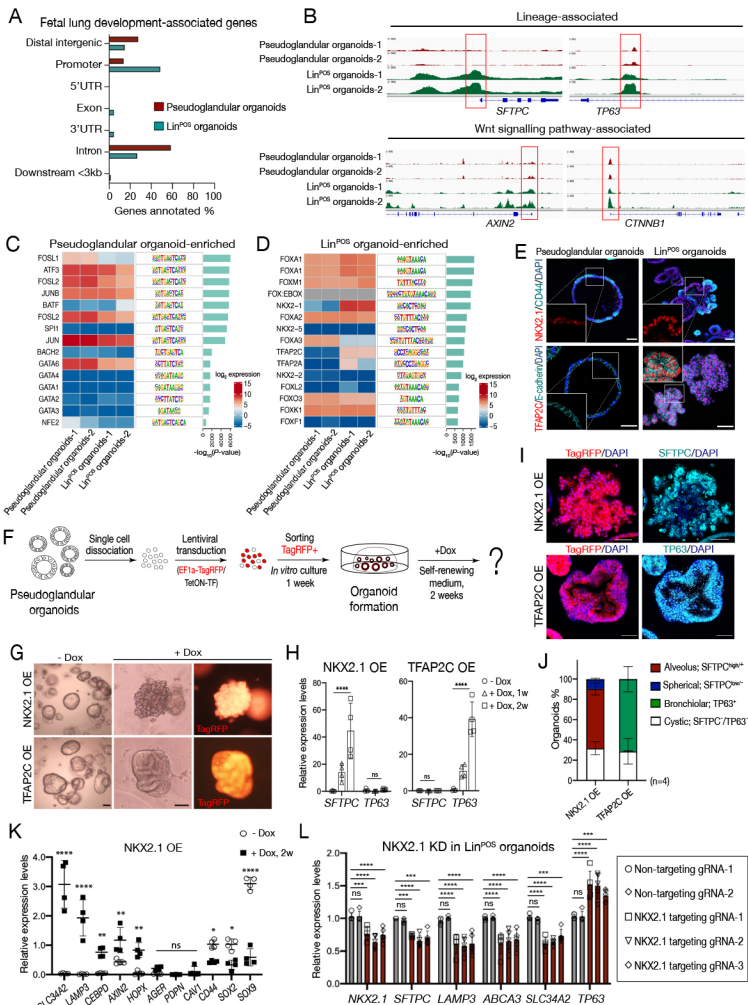

Fig. 6. Analysis of naturally occurring human genetic variation using organoid assays.

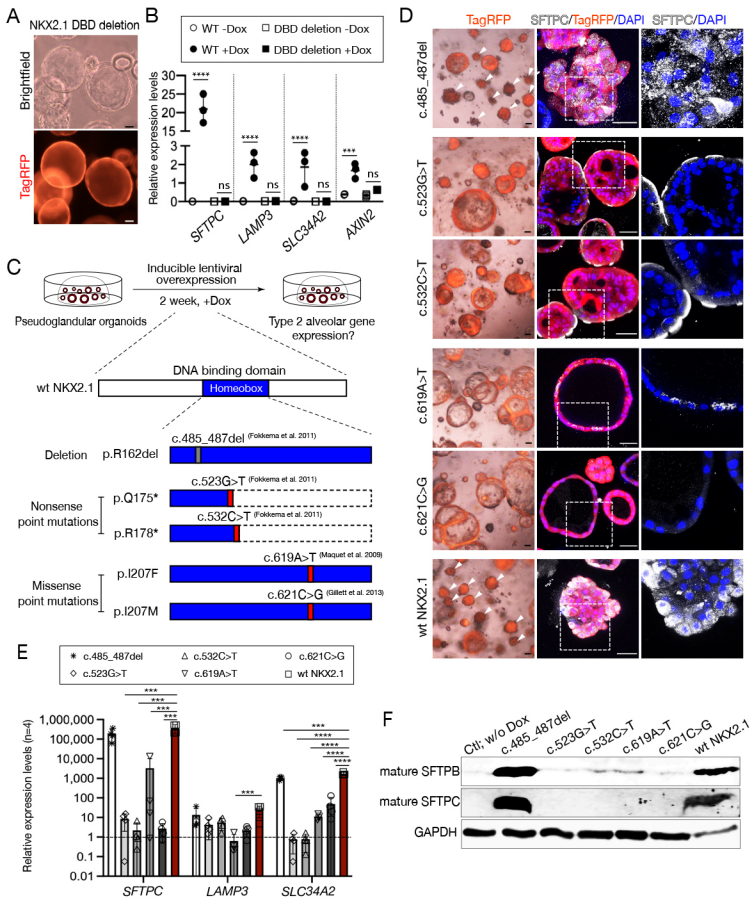

Fig.7. Efficient *in vitro* differentiation of Lin<sup>POS</sup> organoids to alveolar type 2 cell fate

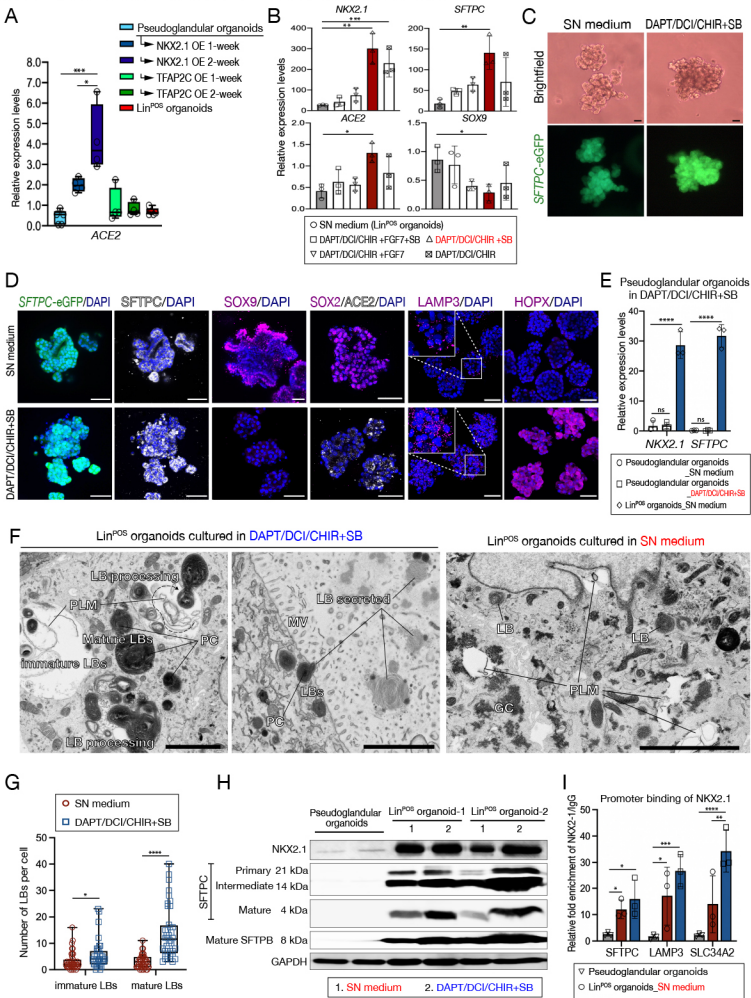



Extended Data Fig. 1

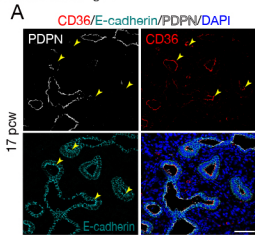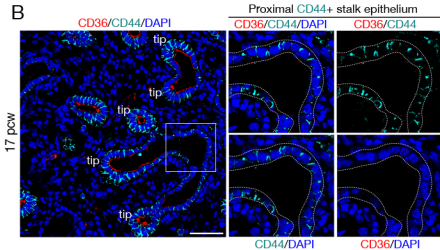

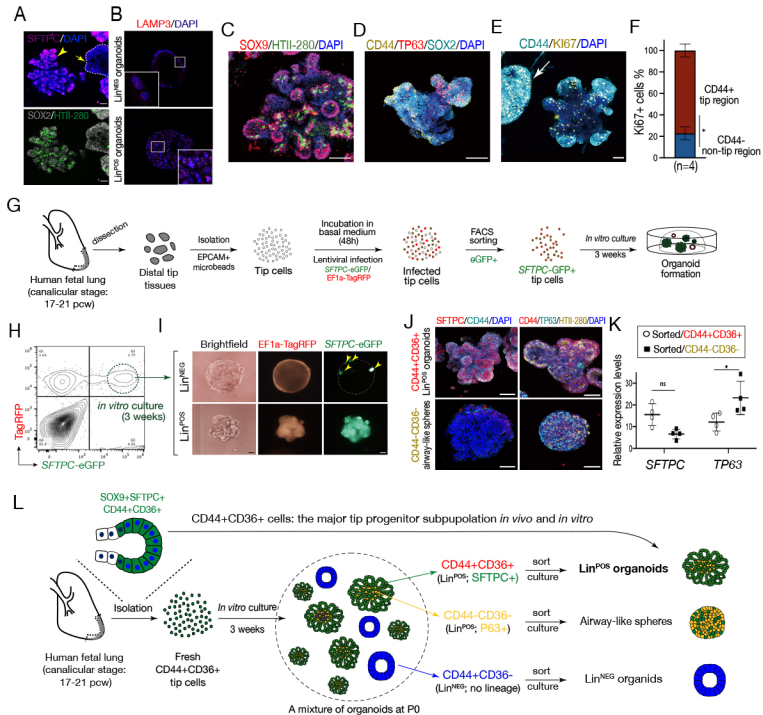

## A Pseudoglandular stage

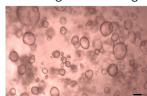

Pseudoglandular organoids

## Canalicular stage

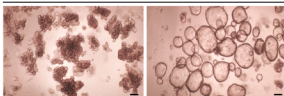Lin<sup>POS</sup> organoidsLin<sup>NEG</sup> organoids

## B

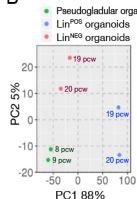

## C

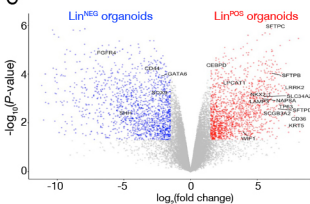

## D

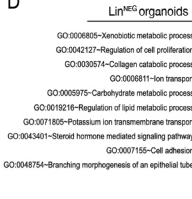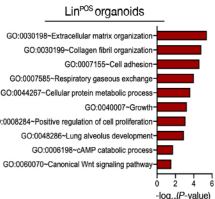

## F

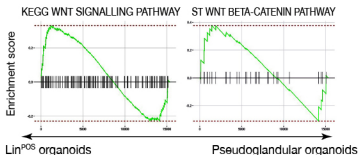

## E

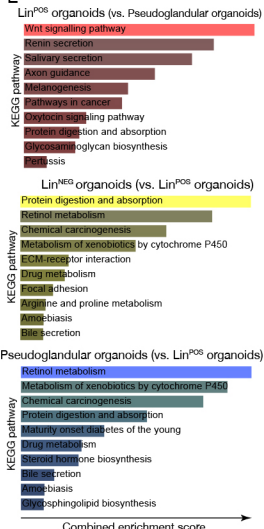

## G

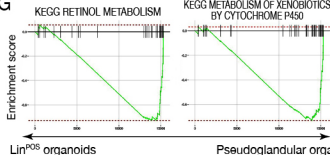

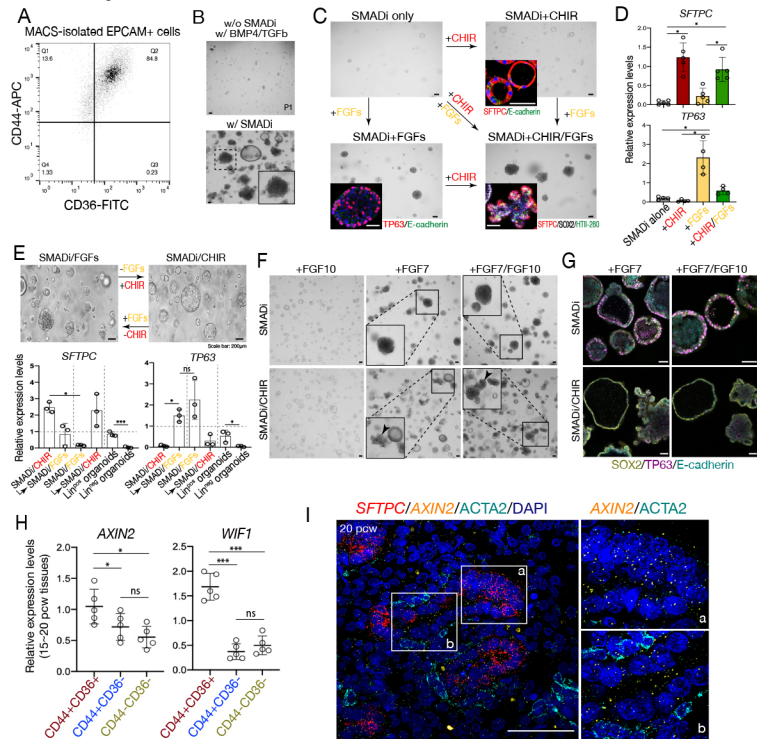

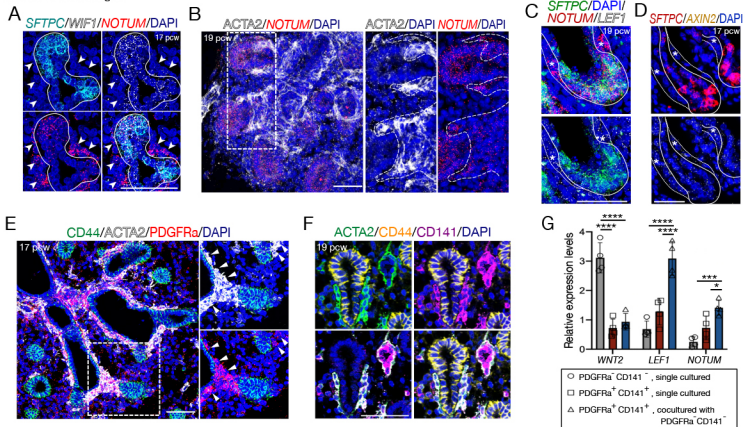



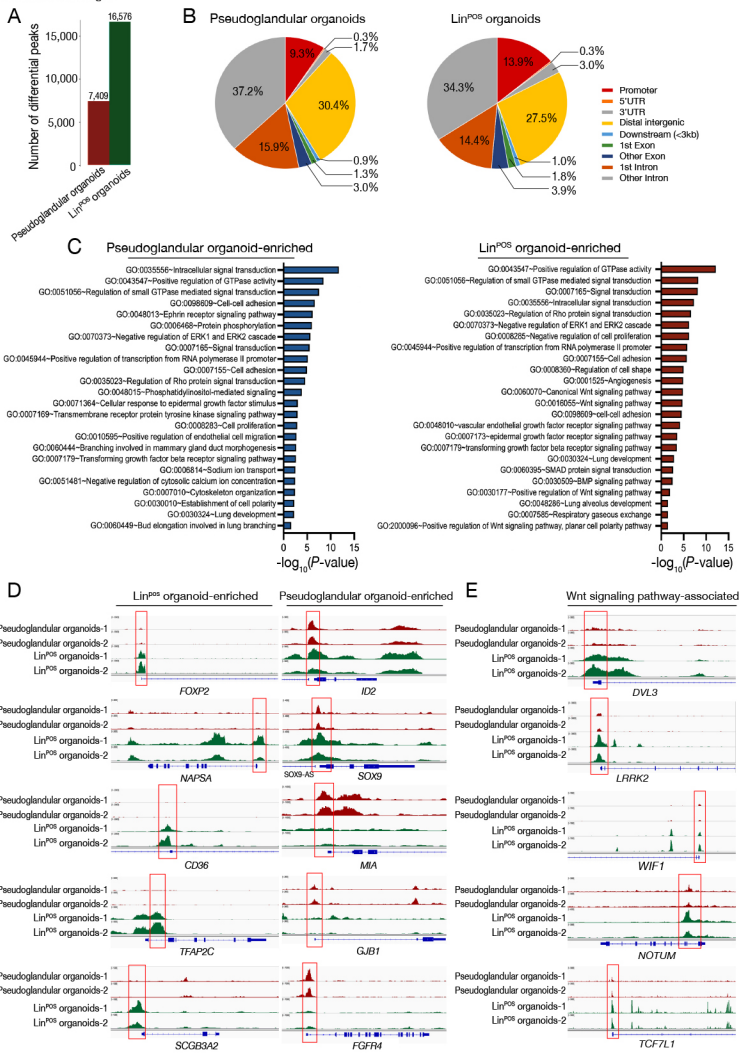

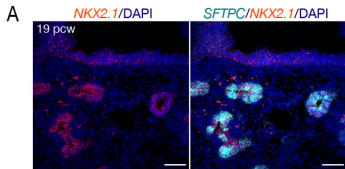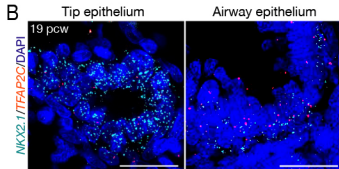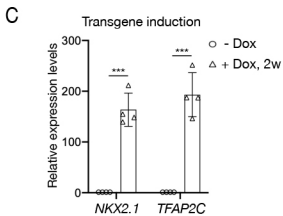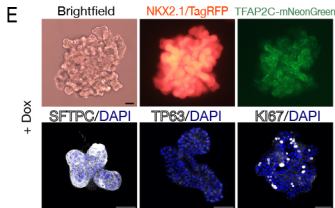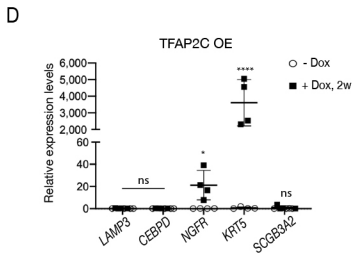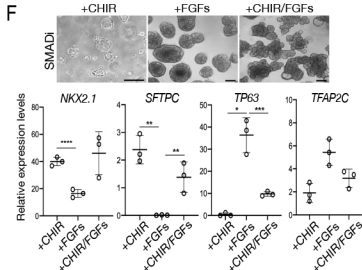

Extended Data Fig. 8

**A** Pseudoglandular organoids NKX2.1 OE 2-week

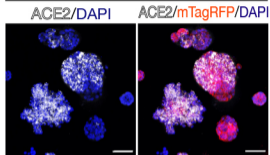

**B**

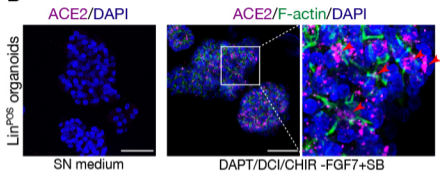

**C**

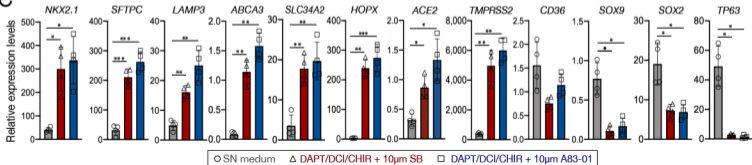

Source: http://biorxiv.org/content/10.1101/2021.06.30.450501v1.full.pdf
